# Supplementary material for: Cyclic and linear dithienyl-anthryl vinylenes: synthesis, X-ray crystallography, spectroscopic properties, and photoinduced mechanical motions
Source: Royal Society of Chemistry journal article supplement (doi:10.1039/d1tc04619e), 2022-01-01
Supplement: d1tc04619e1.pdf [file d1tc04619e1.pdf]

*Supporting information for*

**Cyclic and Linear Dithienyl-Anthryl Vinylenes: Synthesis,  
X-ray Crystallography, Spectroscopic Properties, and  
Photoinduced Mechanical Motions**

Pin-Rong Wu,<sup>a</sup> Chi-Hsien Wang,<sup>a</sup> Yi-Wen Chen,<sup>a</sup> Yen-Jen Lin,<sup>a</sup> Tomohito Ide,<sup>b</sup>  
Yoshitaka Tsuchido,<sup>c</sup> Yoshihisa Sei<sup>d</sup> and Masaki Horie\*<sup>a</sup>

<sup>a</sup> *Department of Chemical Engineering, National Tsing Hua University, 101, Section 2, Kuang-Fu Road, 30013 Taiwan. E-mail: [mhorie@mx.nthu.edu.tw](mailto:mhorie@mx.nthu.edu.tw)*

<sup>b</sup> *Department of Chemical Science and Engineering, National Institute of Technology, Tokyo College, 1220-2 Kunugida-machi, Hachioji-shi, Tokyo, 193-0997 Japan*

<sup>c</sup> *Department of Chemistry, Faculty of Science, Tokyo University of Science, 1-3 Kagurazaka, Shinjuku-ku, Tokyo 162-8601, Japan*

<sup>d</sup> *Open Facility Center, Tokyo Institute of Technology, 4259 Nagatsuta, Midori-ku, Yokohama 226-8503, Japan*

**Contents**

1. Characterization
2. Crystallographic data
3. Photoirradiation to solutions
4. Photoirradiation to free-standing films
5. Density functional calculations
6. Force measurements
7. DSC
8. X-ray diffraction
9. Polarized optical microscopy
10. Cartesian coordinates of the optimized structure

# 1. Characterization

## 1-1 Characterization of 1

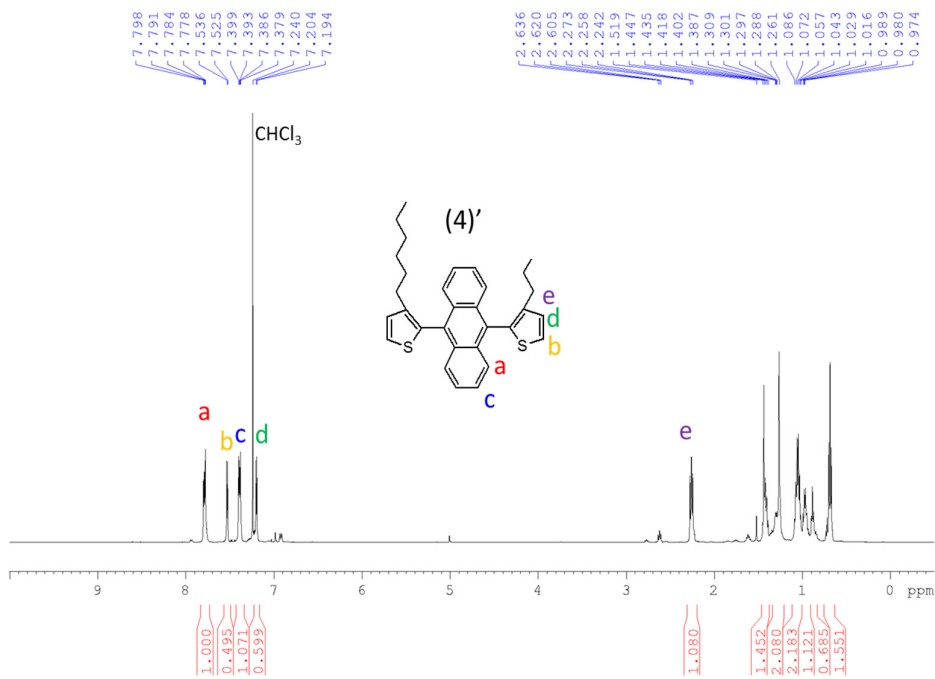

Fig. S1 <sup>1</sup>H NMR spectrum (500MHz, CDCl<sub>3</sub>) of *cis*-conformer.

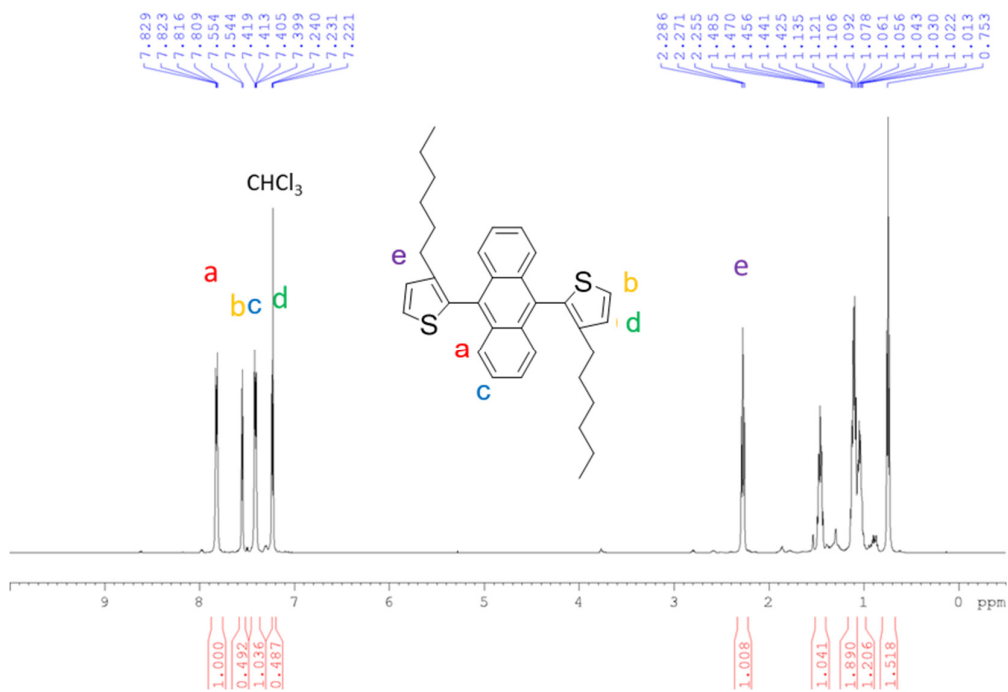

Fig. S2 <sup>1</sup>H NMR spectrum (500MHz, CDCl<sub>3</sub>) of *trans*-conformer.

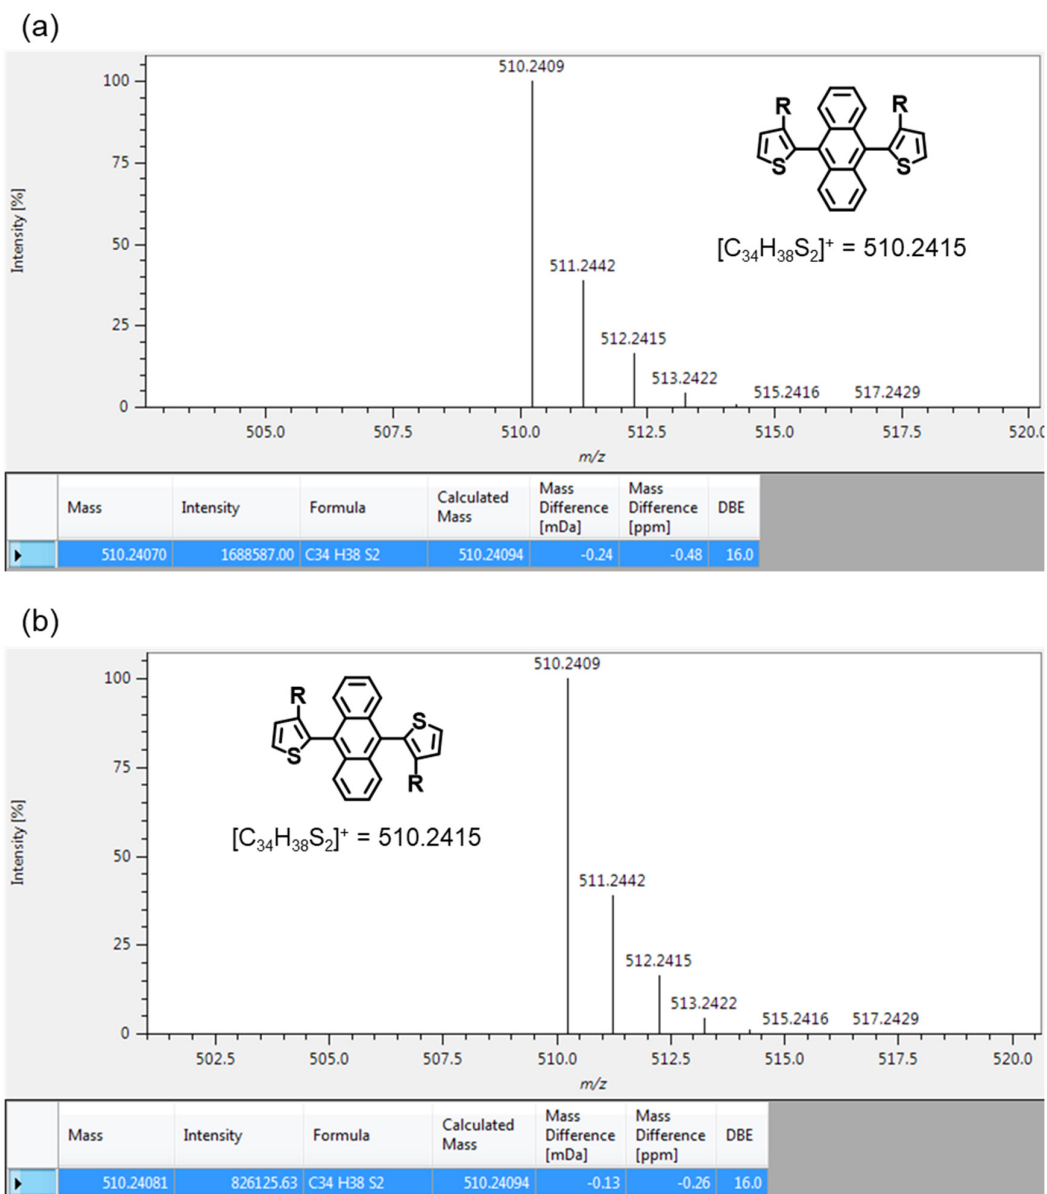

**Fig. S3** HRFD-MS spectra of (a) *cis*-conformer and (b) *trans*-conformer (R = hexyl).

## 1-2 Characterization of **aa** and **2b**

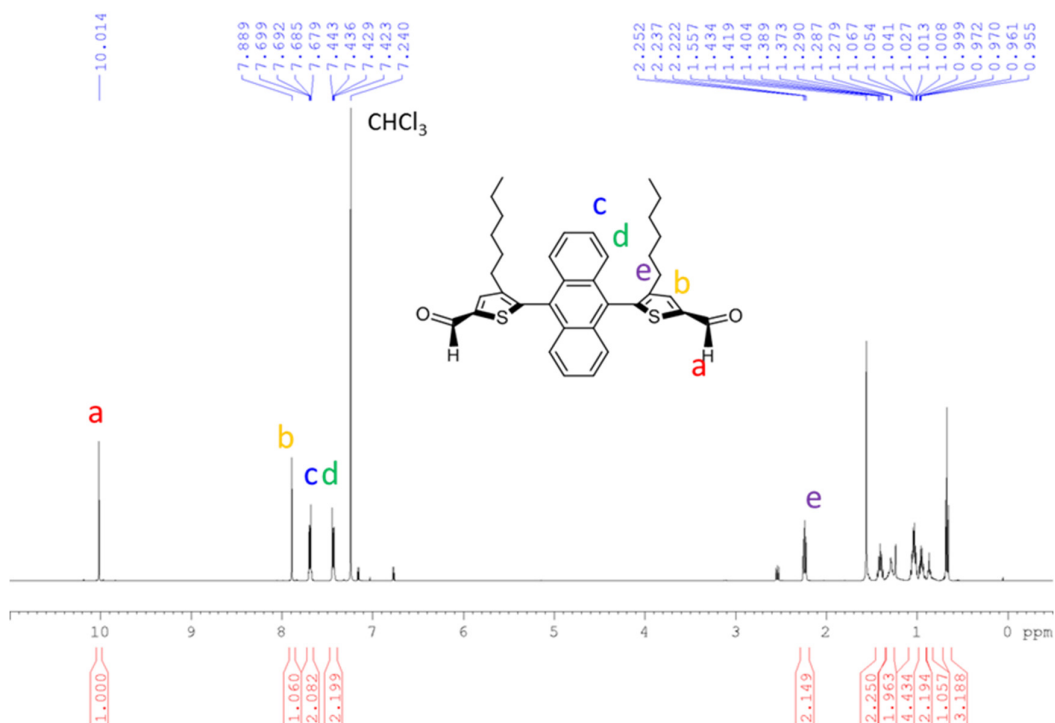

**Fig. S4** <sup>1</sup>H NMR spectrum (500 MHz, CDCl<sub>3</sub>) of **2a**.

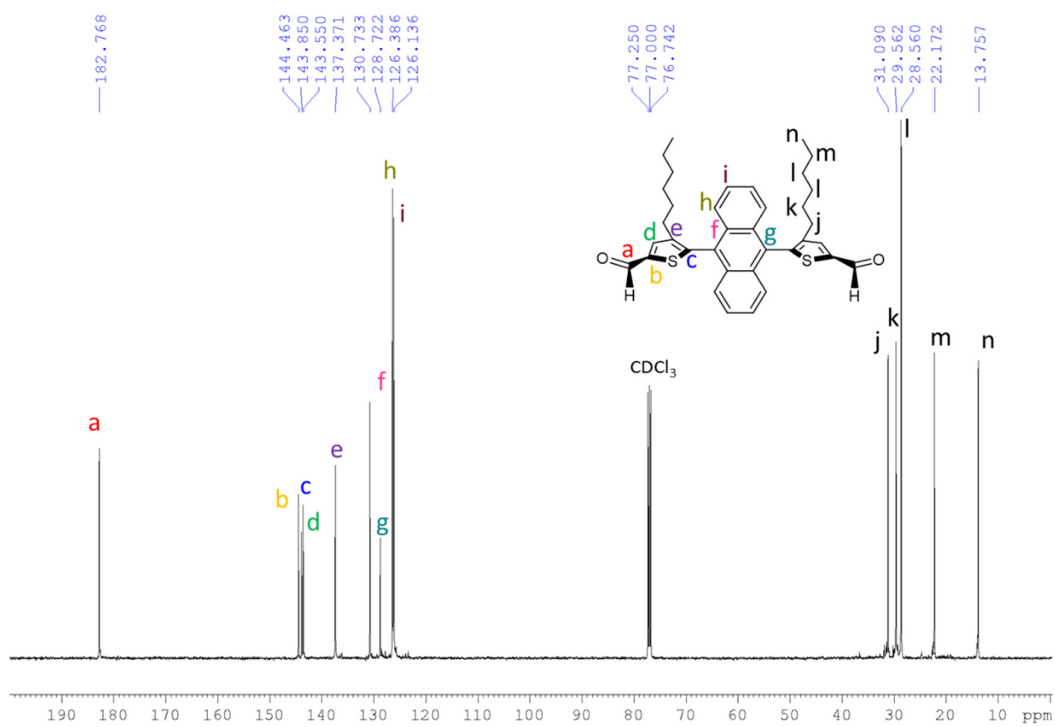

**Fig. S5** <sup>13</sup>C NMR spectrum (125 MHz, CDCl<sub>3</sub>) of **2a**.

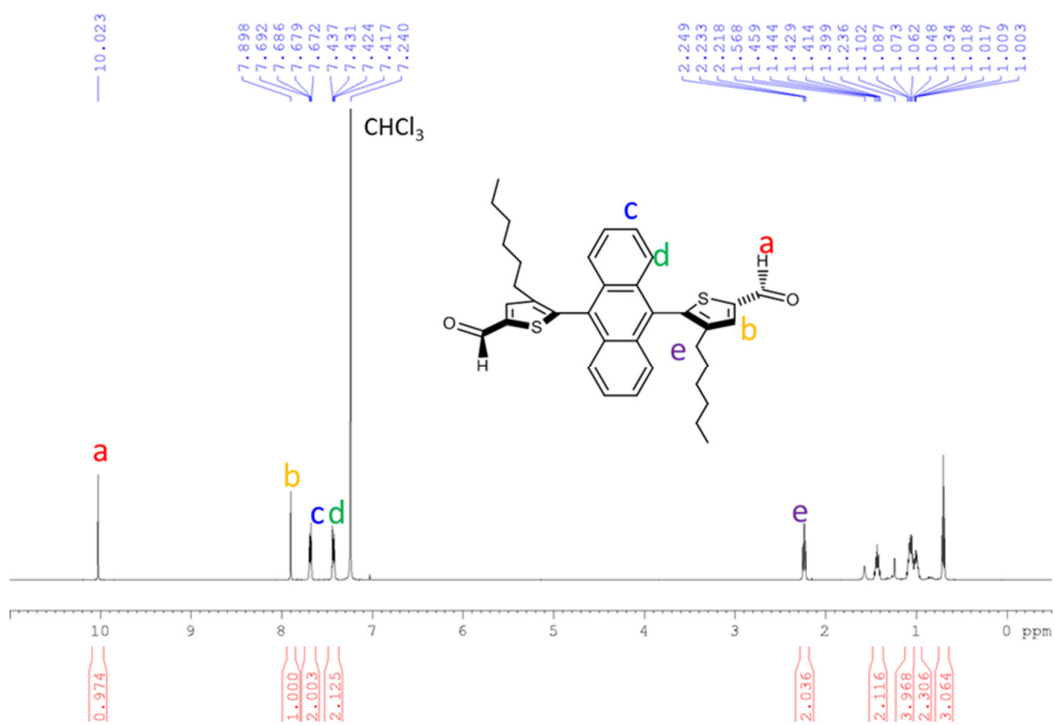

**Fig. S6** <sup>1</sup>H NMR spectrum (500 MHz, CDCl<sub>3</sub>) of **2b**.

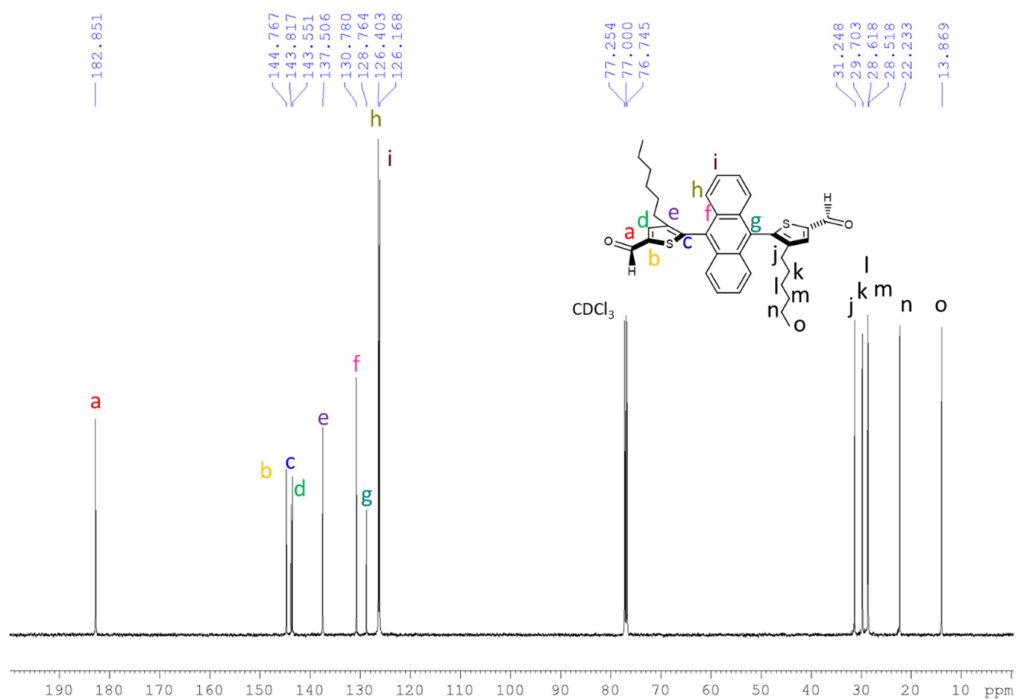

**Fig. S7** <sup>13</sup>C NMR spectrum (125 MHz, CDCl<sub>3</sub>) of **2b**.

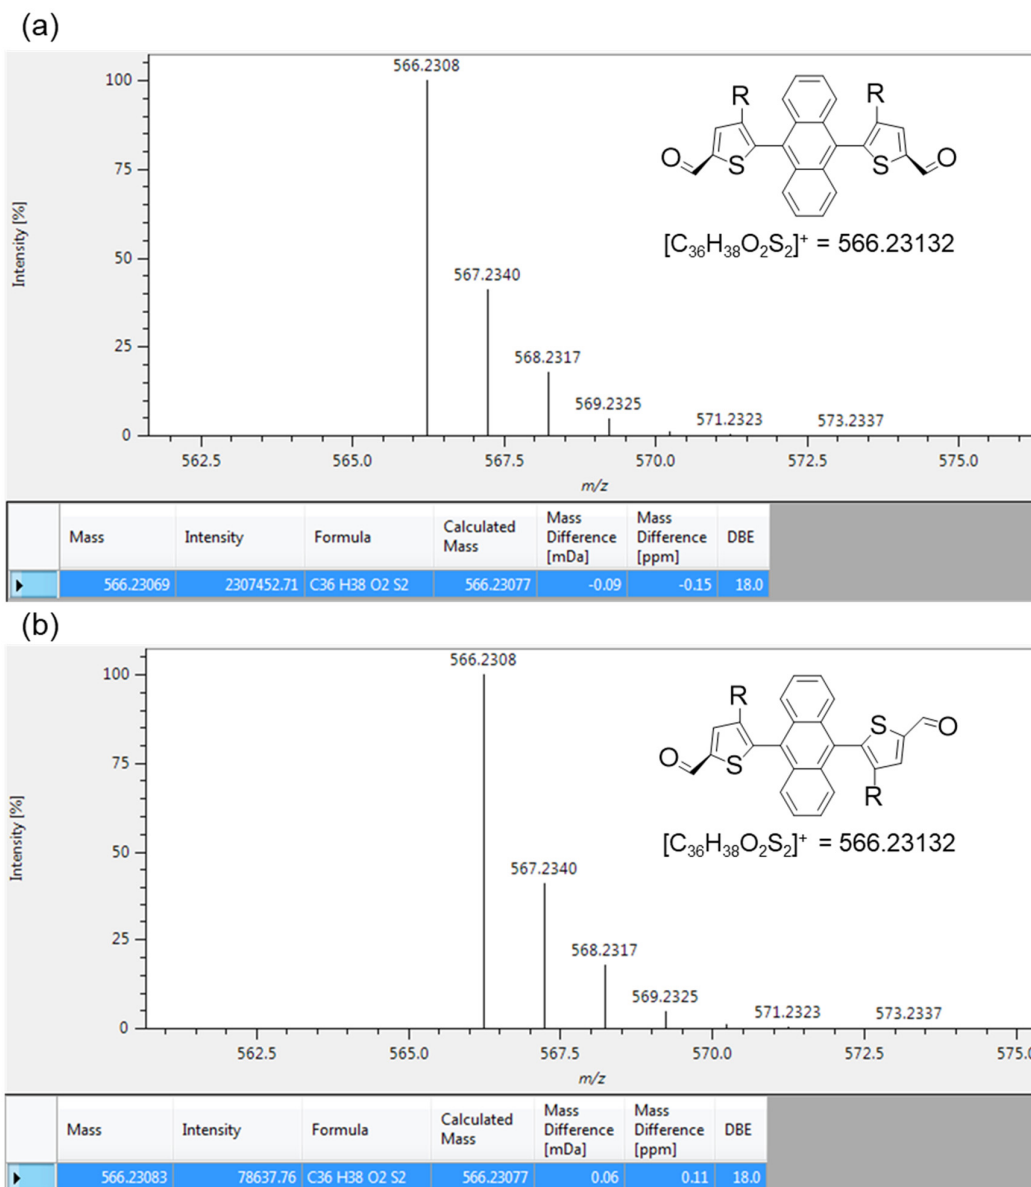

**Fig. S8** HRFD-MS spectra of (a) **2a** and (b) **2b** (R= hexyl).

### 1-3 Characterization of 3 and 4

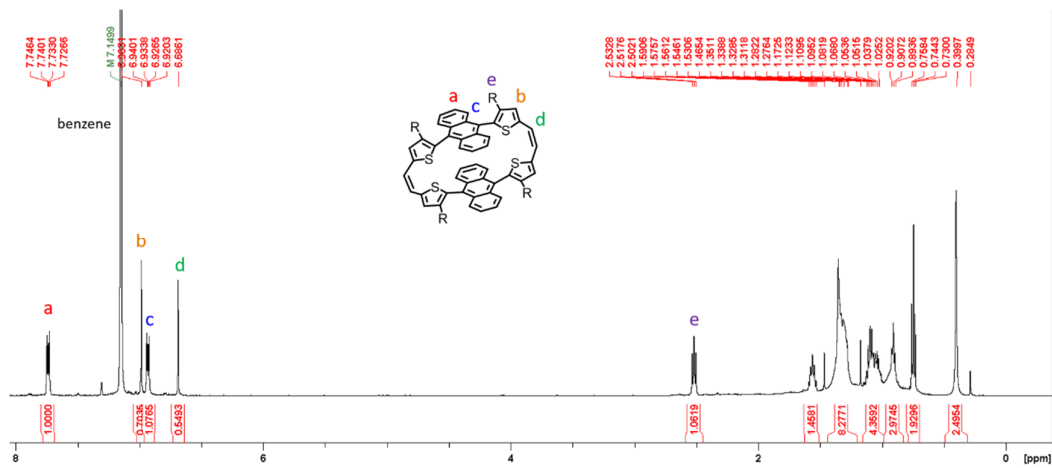

Fig. S9  $^1\text{H}$  NMR spectrum (500 MHz, *d*-Benzene) of 3 (R= hexyl).

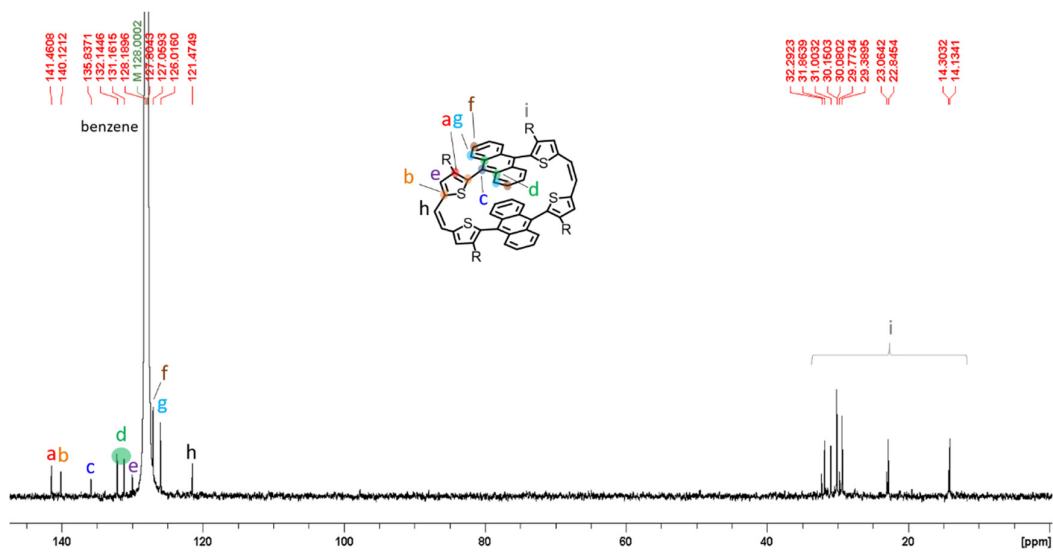

Fig. S9  $^{13}\text{C}$  NMR spectrum (125 MHz, *d*-Benzene) of 3 (R= hexyl).

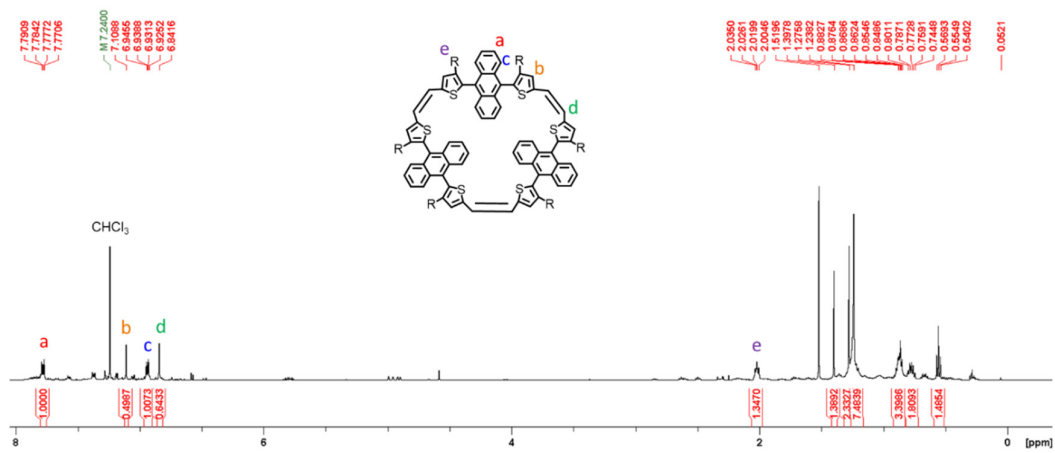

**Fig. S10** <sup>1</sup>H NMR spectrum (500 MHz, *d*-Benzene) of **4** (R= hexyl).

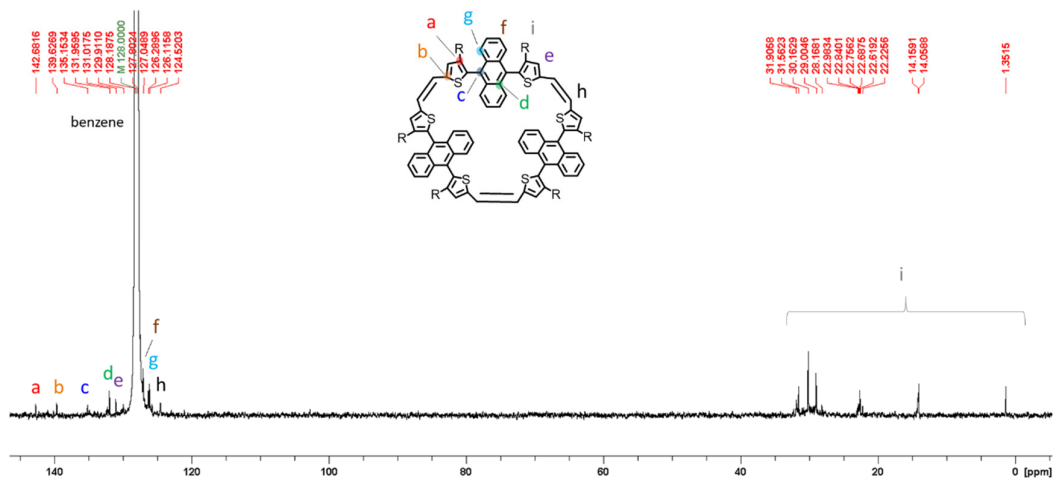

**Fig. S11** <sup>13</sup>C NMR spectrum (125 MHz, *d*-Benzene) of **4** (R= hexyl).



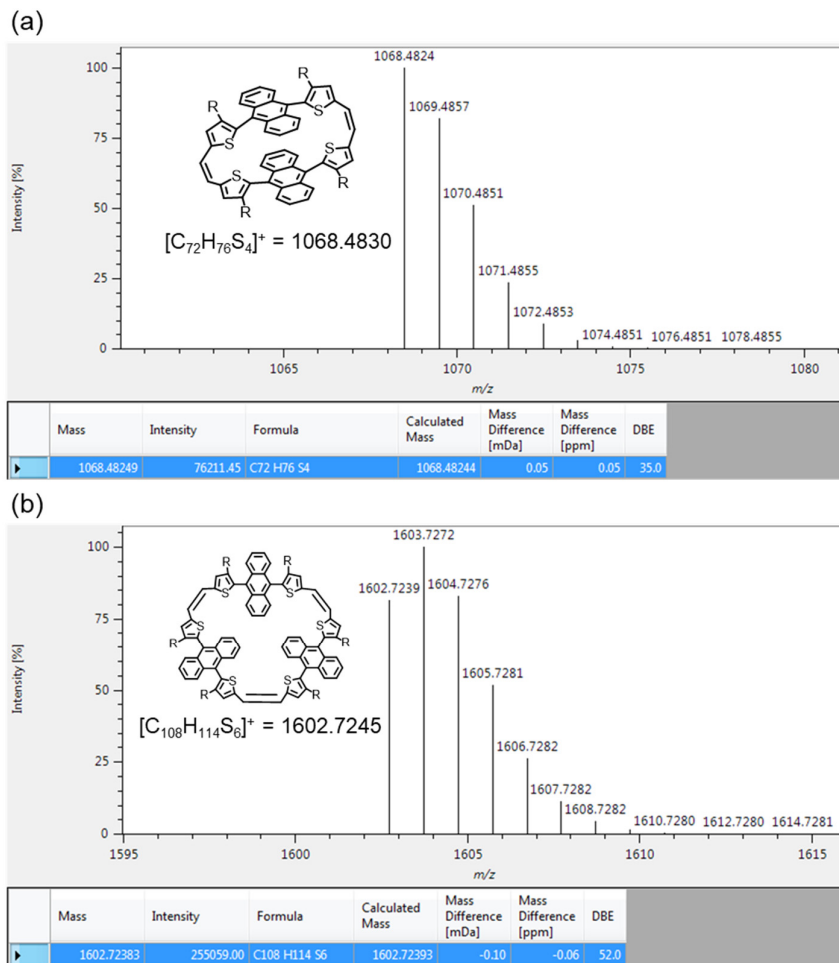

**Fig. S12** HRFD-MS spectra of (a) **3** and (b) **4** (R= hexyl).

## 1-4 Characterization of 5

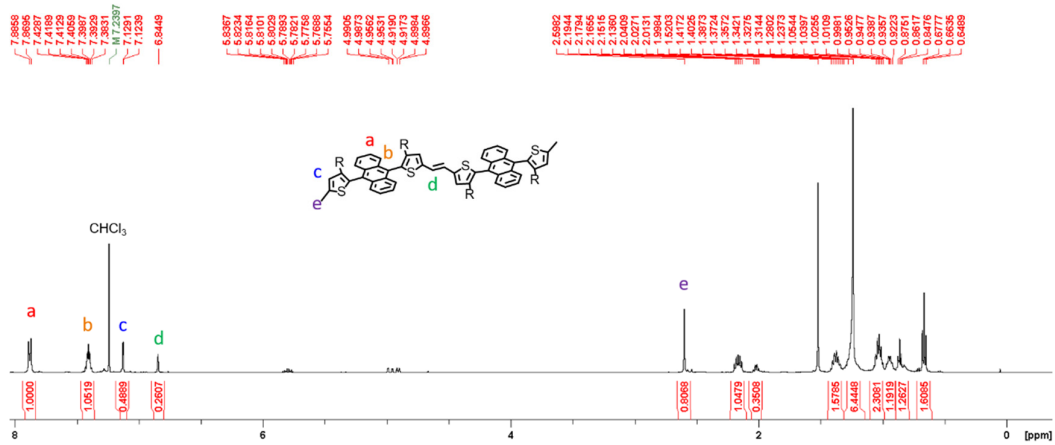

**Fig. S13**  $^1\text{H}$  NMR spectrum (500 MHz,  $\text{CDCl}_3$ ) of **5** (R= hexyl).

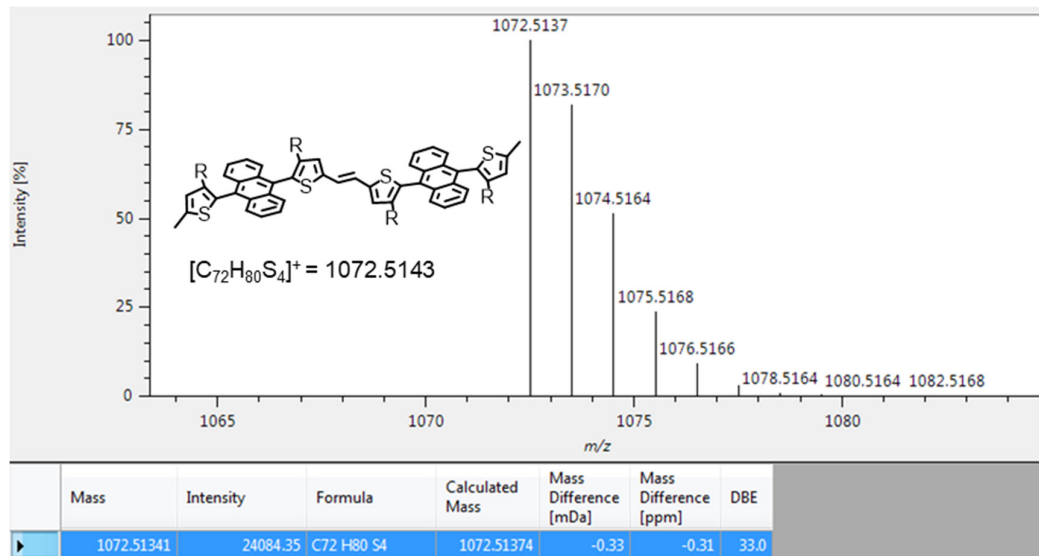

**Fig. S14** HRFD-MS spectra of **5** (R= hexyl).

## 1-5 Characterization of polymers

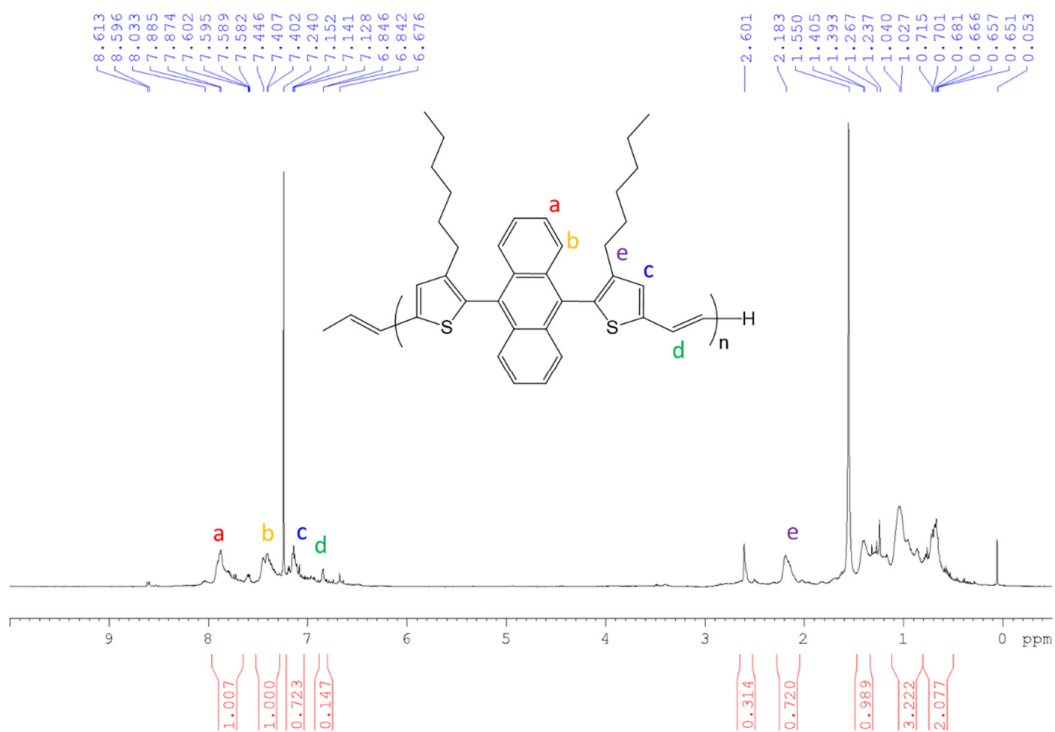

**Fig. S15** <sup>1</sup>H NMR spectrum (500 MHz, CDCl<sub>3</sub>) of 6.

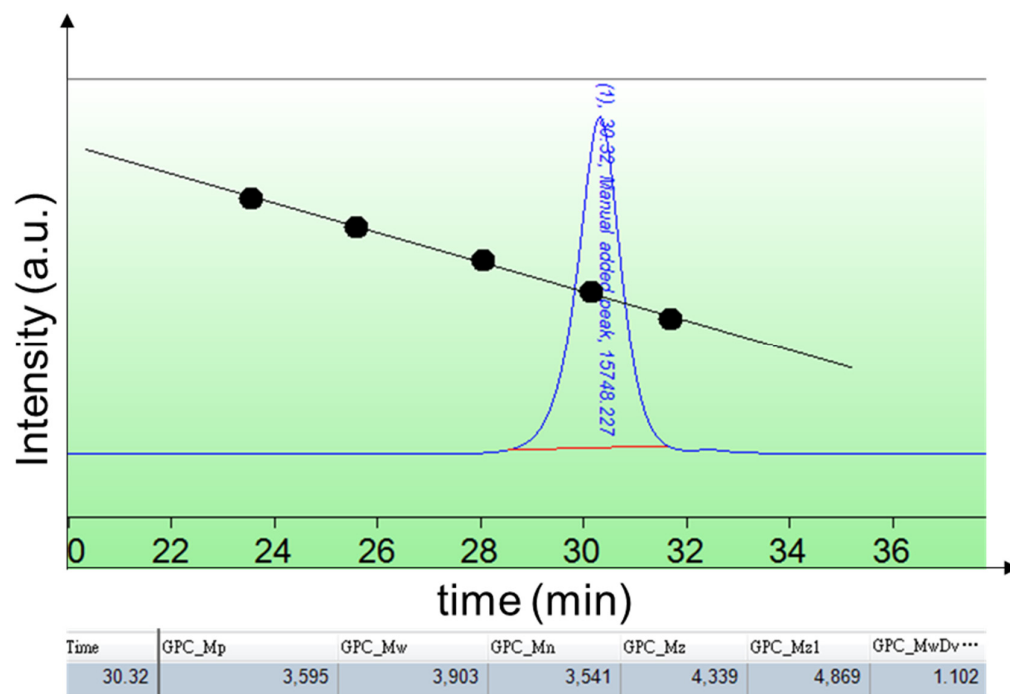

**Fig. S16** GPC elution curve of 6.

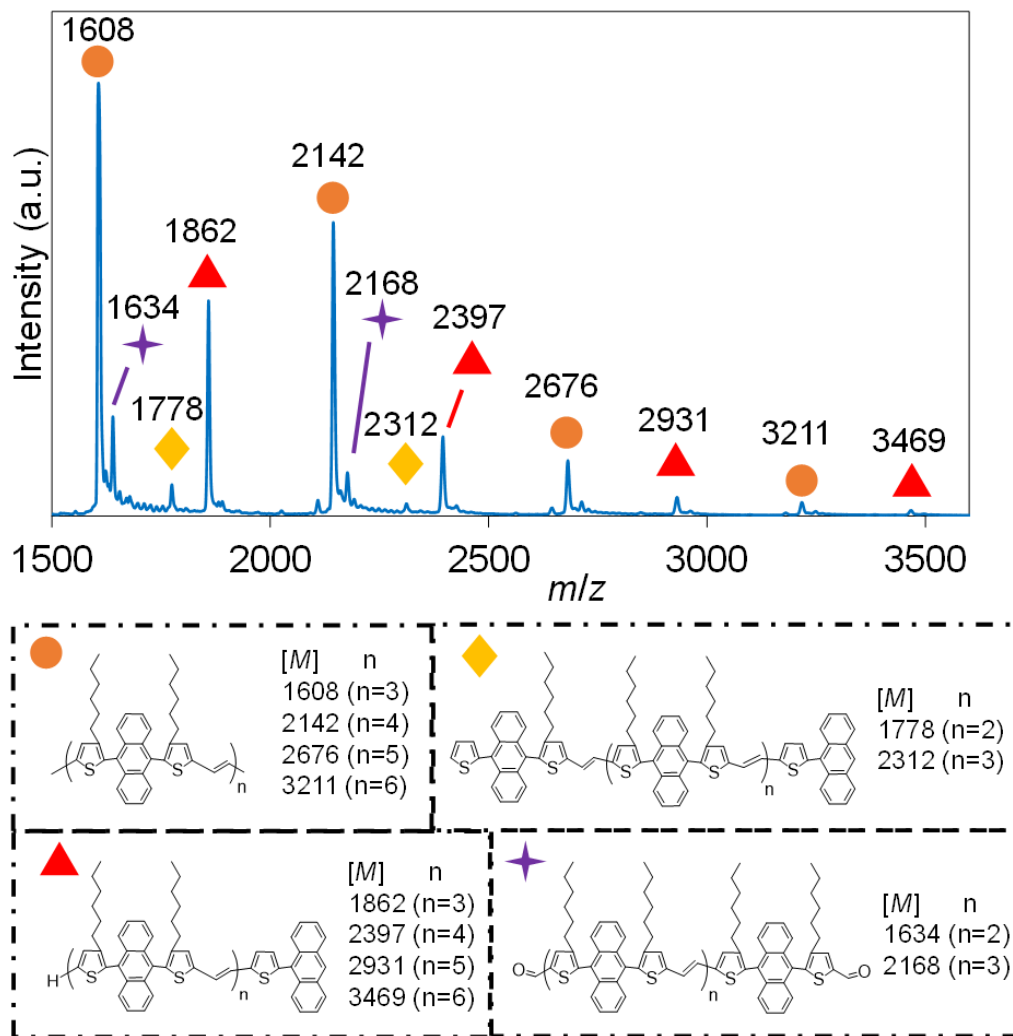

Fig. S17 MALDI-TOF mass spectrum of 6.

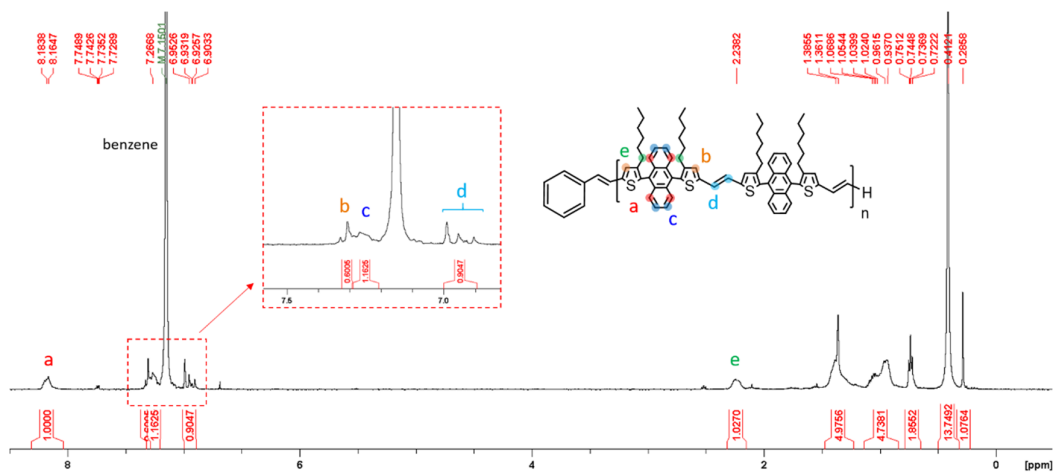

Fig. S18 <sup>1</sup>H NMR spectrum (500MHz, *d*-Benzene) of 7 (R= hexyl).

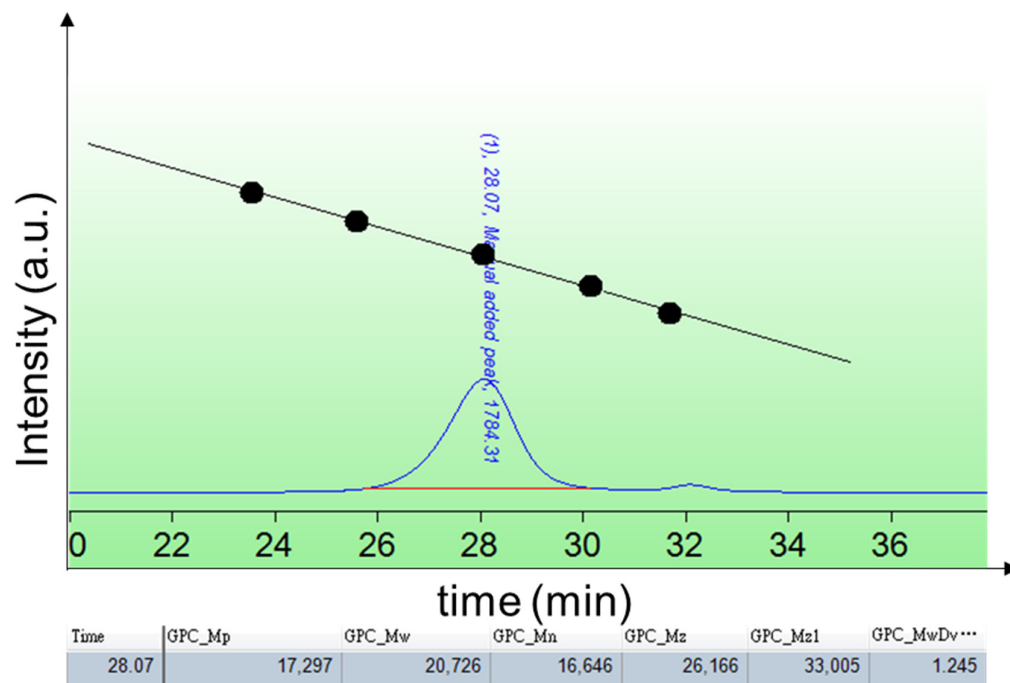

Fig. S19 GPC elution curve of 7.

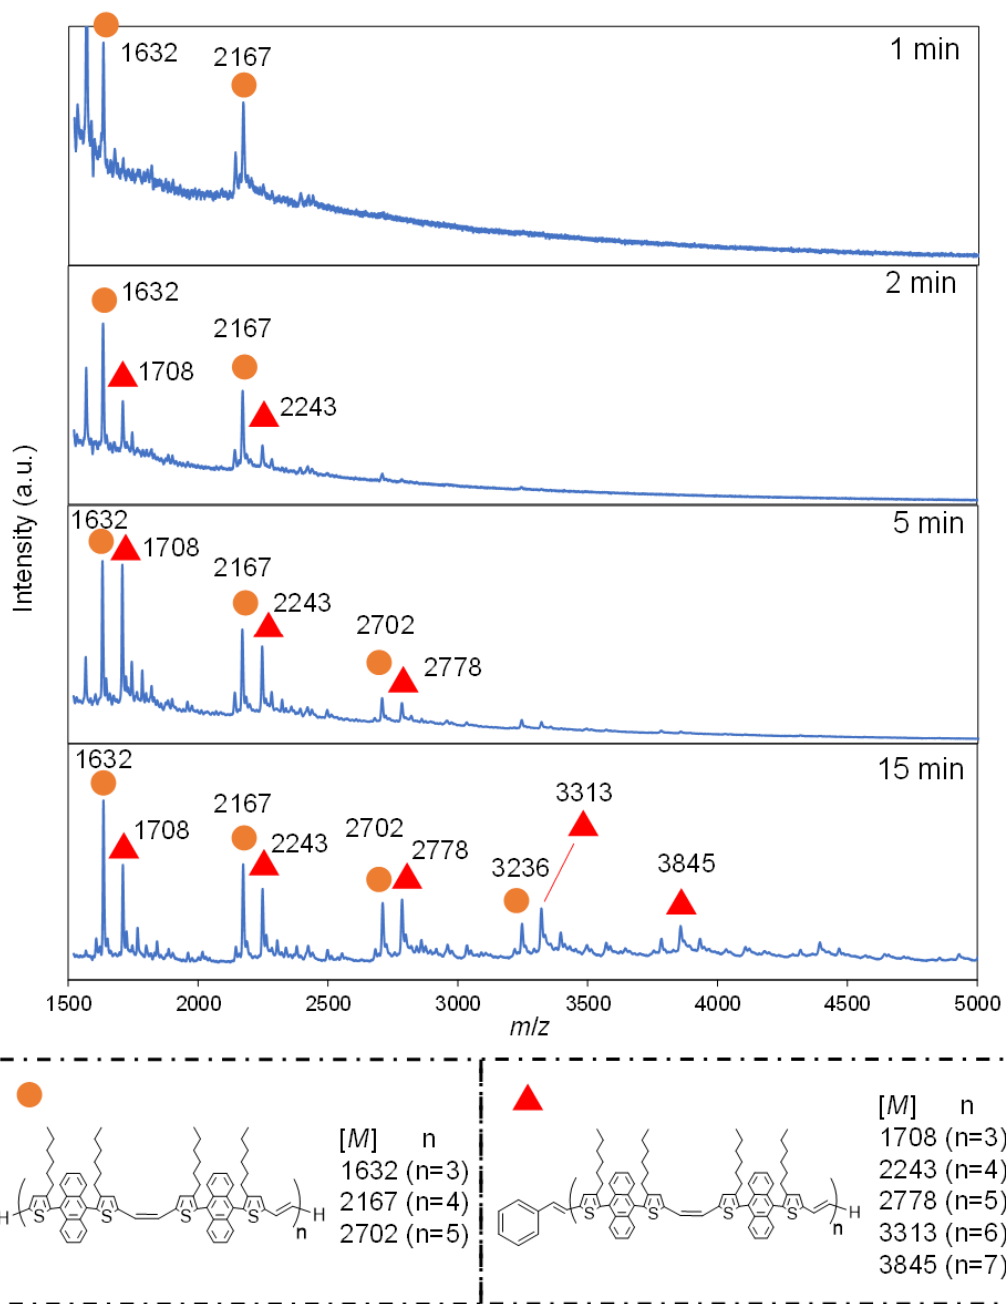

**Fig. S20** MALDI-TOF mass spectra of **7**.

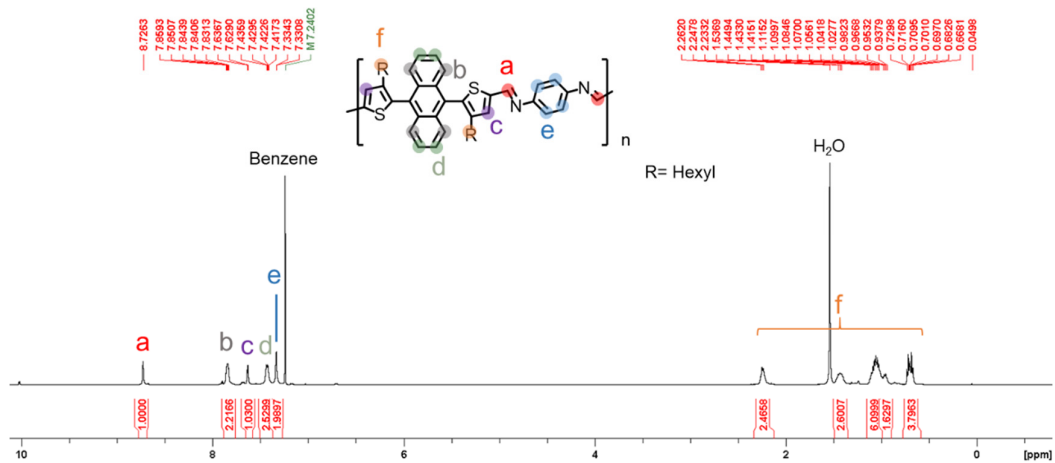

Fig. S21  $^1\text{H}$  NMR spectrum (500MHz, *d*-Benzene) of 8 (R= hexyl).

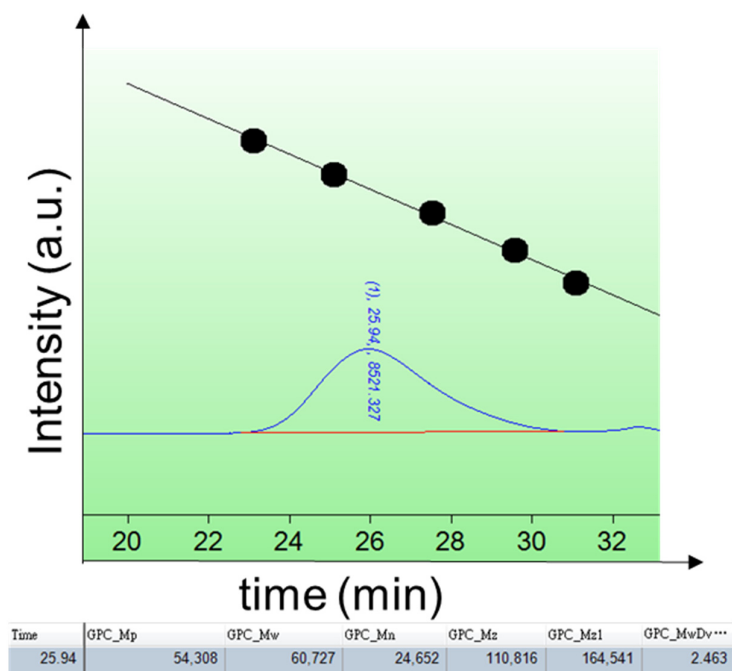

Fig. S22 GPC elution curve of 8.

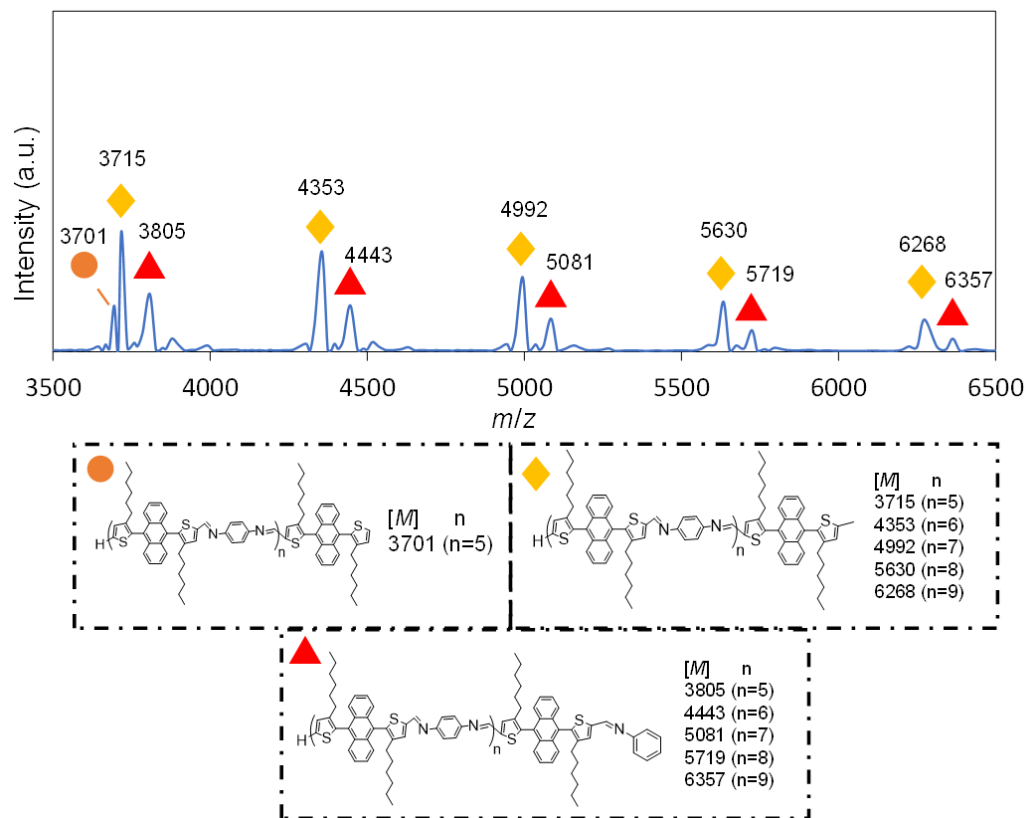

**Fig. S23** MALDI-TOF mass spectrum of **8**.



1-6 Comparison of mass spectra of McMurry coupling products of **2a** and **2b**

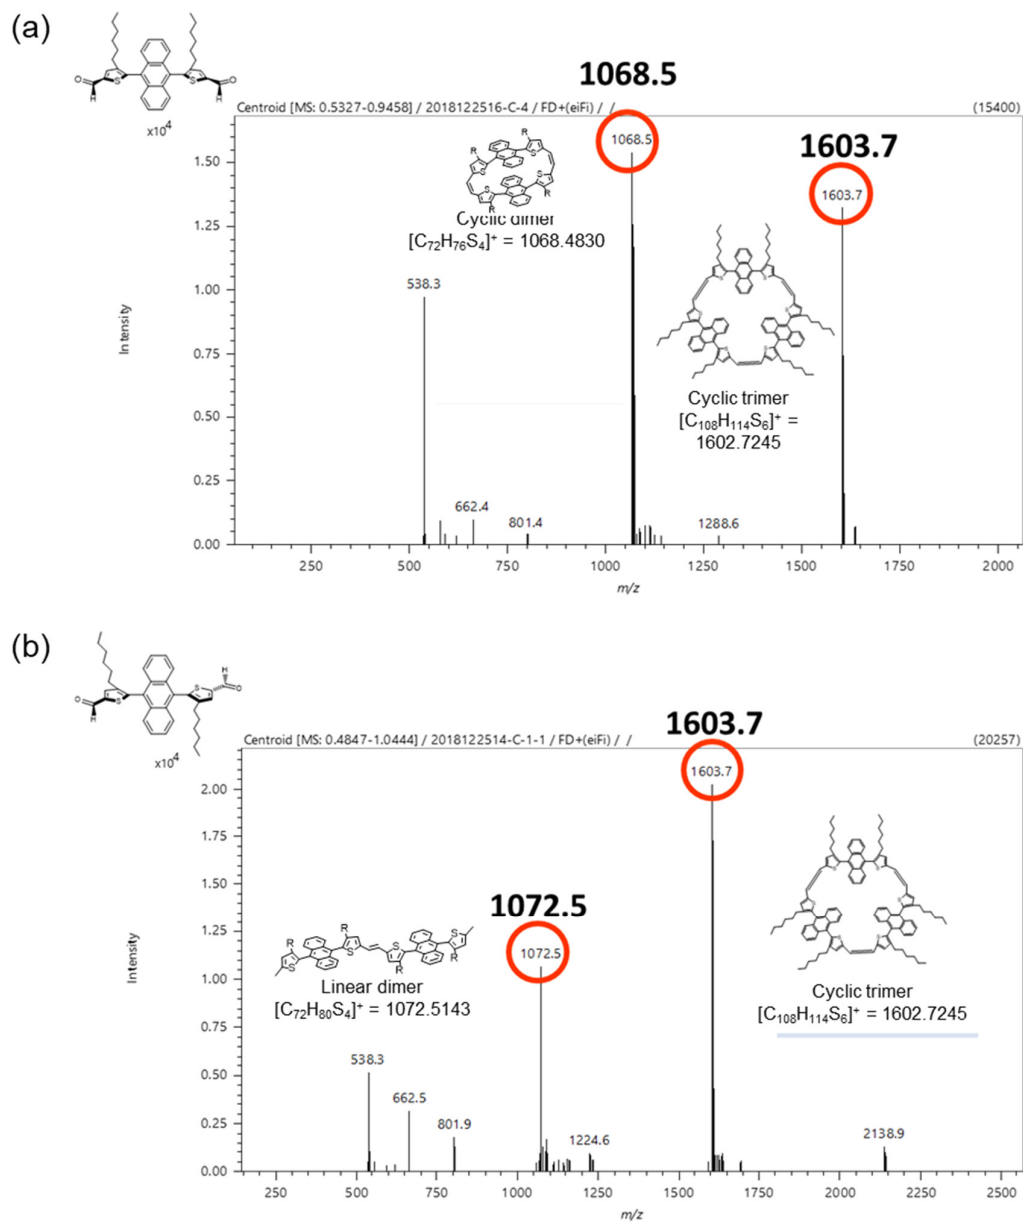

**Fig. S24** LRFD mass spectra of McMurry coupling products of (a) **2a** and (b) **2b**. **2a** provided cyclic dimer and trimer, whereas **2b** provided linear dimer and cyclic trimer.

## 2. Crystallographic data

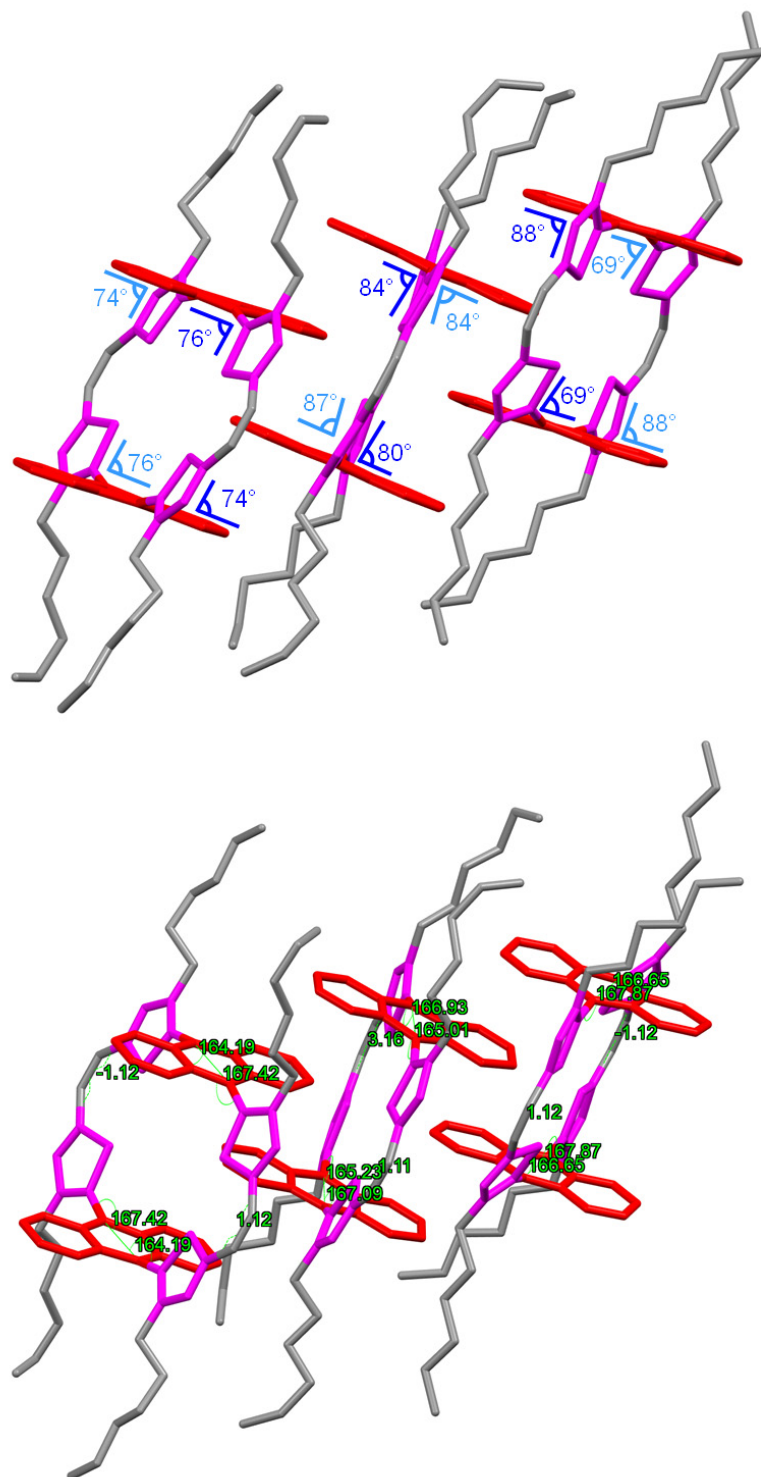

Fig. S26 Molecular structures of **3** with plane and torsion angles.

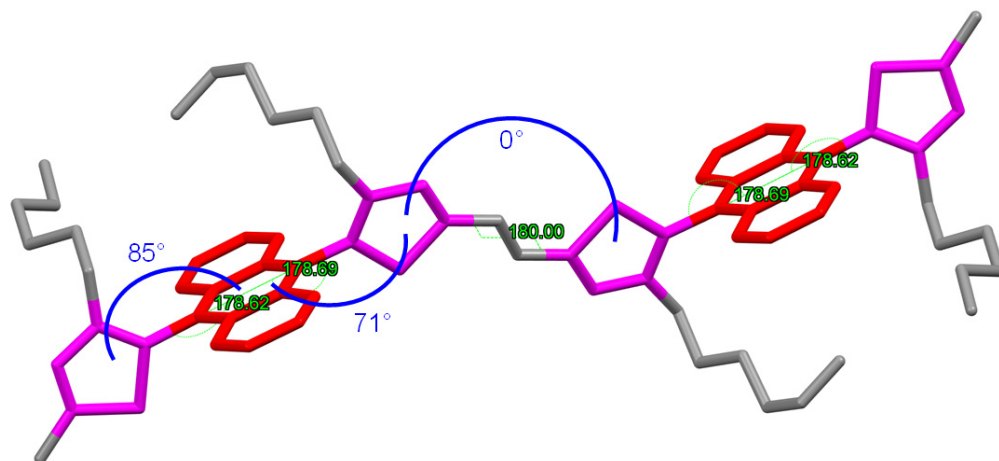

Fig. S27 Molecular structures of **5** with plane and torsion angles.

**Table S1** Crystal data and structure refinement for **2a**, **2b**, **3**, and **5**.

|                              | <b>2a</b>                                                     | <b>2b</b>                                                     | <b>3</b>                                         | <b>5</b>                                       |
|------------------------------|---------------------------------------------------------------|---------------------------------------------------------------|--------------------------------------------------|------------------------------------------------|
| Formula                      | C <sub>36</sub> H <sub>38</sub> O <sub>2</sub> S <sub>2</sub> | C <sub>36</sub> H <sub>38</sub> O <sub>2</sub> S <sub>2</sub> | C <sub>144</sub> H <sub>148</sub> S <sub>8</sub> | C <sub>72</sub> H <sub>80</sub> S <sub>4</sub> |
| Molecular weight             | 566.78                                                        | 566.78                                                        | 2135.11                                          | 1072.514                                       |
| Crystal system               | Monoclinic                                                    | Triclinic                                                     | Triclinic                                        | Triclinic                                      |
| Space group                  | P2 <sub>1</sub> /n                                            | P $\bar{1}$                                                   | P $\bar{1}$                                      | P $\bar{1}$                                    |
| <i>a</i> /Å                  | 9.6891(4)                                                     | 9.1606(3)                                                     | 17.9088(9)                                       | 9.3240(6)                                      |
| <i>b</i> /Å                  | 21.8811(9)                                                    | 10.9813(4)                                                    | 18.9894(9)                                       | 12.8415(9)                                     |
| <i>c</i> /Å                  | 15.0076(7)                                                    | 15.2260(5)                                                    | 19.8159(6)                                       | 13.6781(10)                                    |
| $\alpha$ /deg                | 90                                                            | 92.296(1)                                                     | 86.346(3)                                        | 72.939(2)                                      |
| $\beta$ /deg                 | 108.614(1)                                                    | 91.607(1)                                                     | 74.574(3)                                        | 86.791(2)                                      |
| $\gamma$ /deg                | 90                                                            | 95.805(1)                                                     | 64.997(5)                                        | 72.114(2)                                      |
| <i>V</i> /Å <sup>3</sup>     | 3015.3(2)                                                     | 1521.79(9)                                                    | 5878.2(5)                                        | 1488.95(18)                                    |
| <i>Z</i>                     | 4                                                             | 2                                                             | 2                                                | 1                                              |
| <i>F</i> (000)               | 1208                                                          | 604                                                           | 2280                                             | 576                                            |
| <i>D</i> /g cm <sup>-3</sup> | 1.248                                                         | 1.237                                                         | 1.206                                            | 1.197                                          |
| Used                         | 4883                                                          | 4324                                                          | 15305                                            | 3714                                           |
| Independent                  | 5508                                                          | 5390                                                          | 77438                                            | 5210                                           |
| <i>R</i>                     | 0.0327                                                        | 0.0625                                                        | 0.1241                                           | 0.0990                                         |
| <i>R</i> <sub>w</sub>        | 0.0814                                                        | 0.1763                                                        | 0.3415                                           | 0.1738                                         |
| GOF                          | 1.015                                                         | 1.050                                                         | 1.288                                            | 1.178                                          |

### 3. Photoirradiation to solutions

#### 3-1 Compound **3** in benzene solution

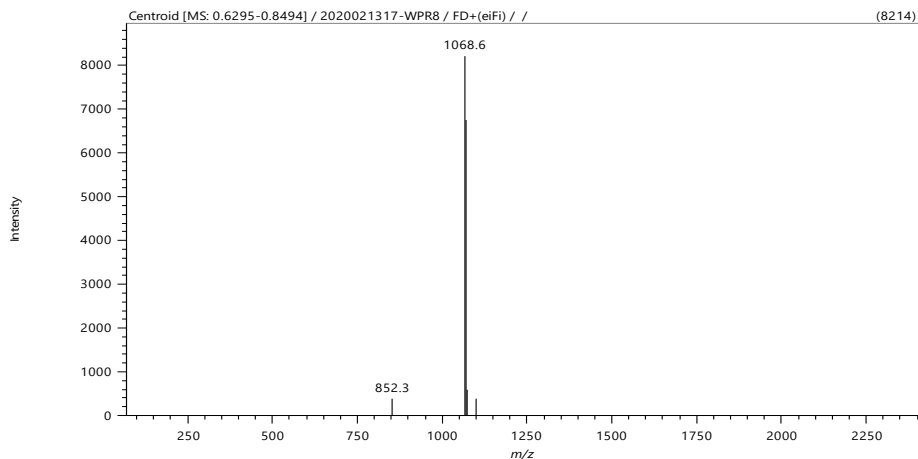

**Fig. S28** LRFD of **3** after irradiation to its benzene solution at 365 nm for 1800s. Its molecular mass unchanged.

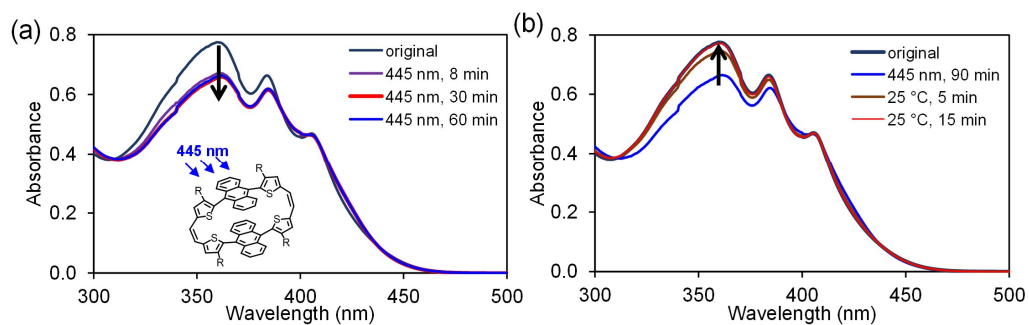

**Fig. S29** (a) Time-dependent UV-Vis spectra of **3** in benzene solution during irradiation using 445-nm laser ( $7.7 \text{ mW cm}^{-2}$ ). (b) Time-dependent PL spectra of **3** in benzene solution at 25 °C.

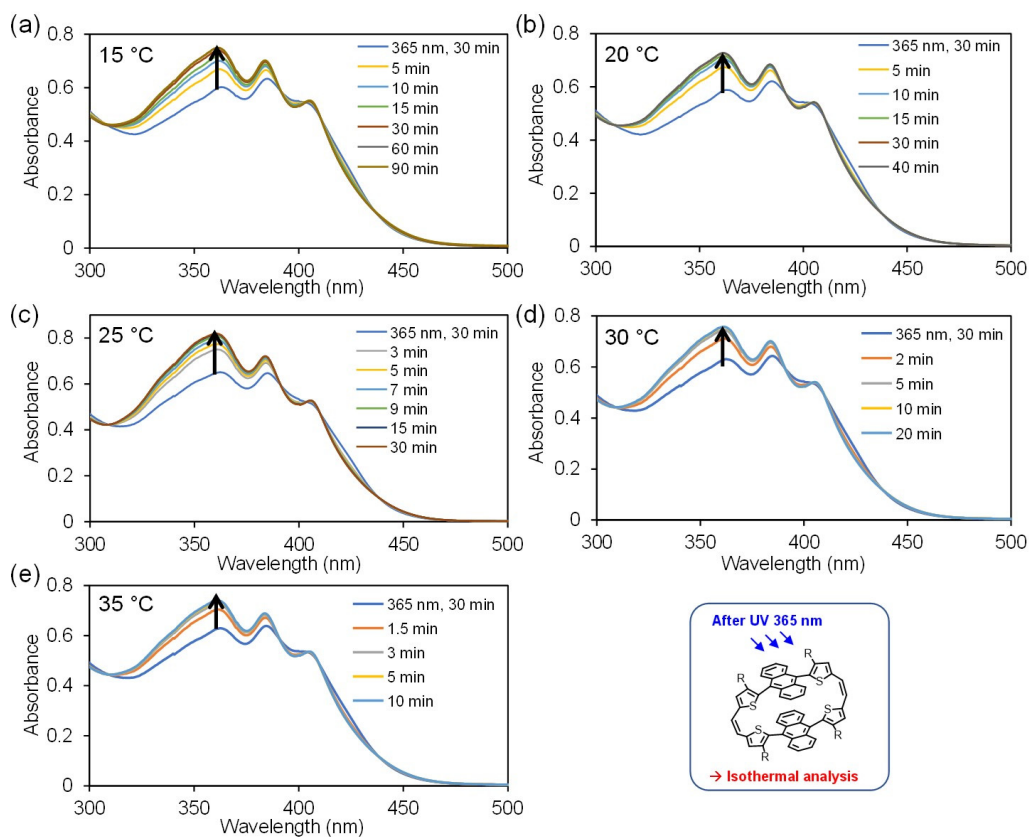

**Fig. S30** Time-dependent UV-Vis spectra of **3** at (a) 15 °C, (b) 20 °C, (c) 25 °C, (d) 30 °C, and (e) 35 °C.

### 3-2 Compound **4** in benzene solution

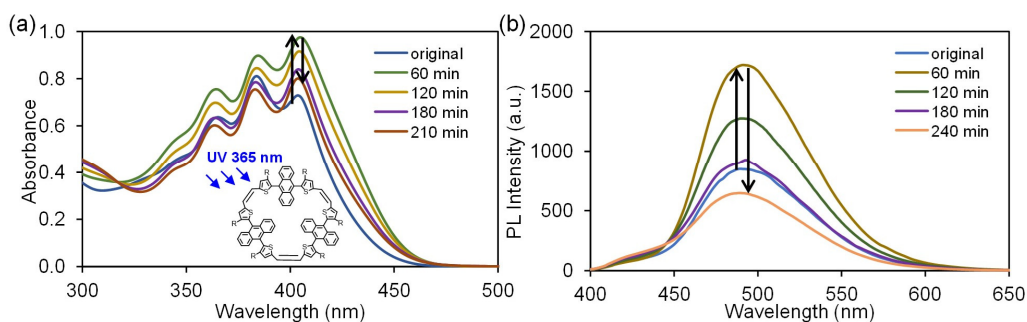

**Fig. S31** (a) Time-dependent UV-vis spectra of **4** in benzene solution after irradiation at 365 nm. (b) Time-dependent PL spectra of **4** in benzene solution after irradiation at 365 nm. A mercury UV lamp (365 nm, 4 W cm<sup>-2</sup>) was used.

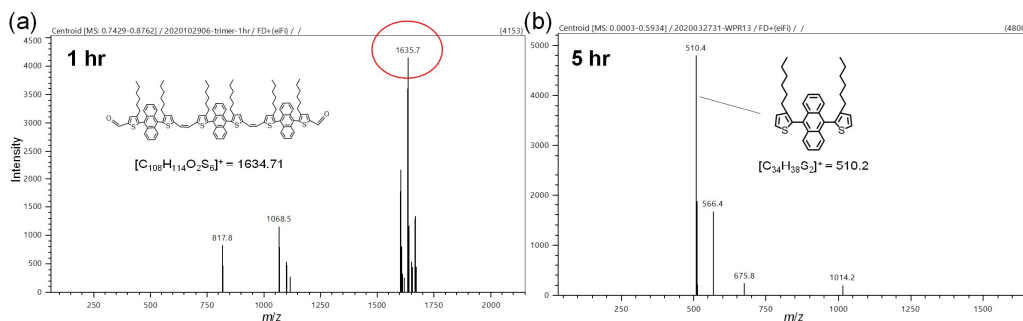

**Fig. S32** LRFD of **4** after irradiation to its benzene solution at 365 nm for (a) 1 hour and (b) 5 hours. Fragmentation occurred.

### 3-3 Compound 5 in benzene solution

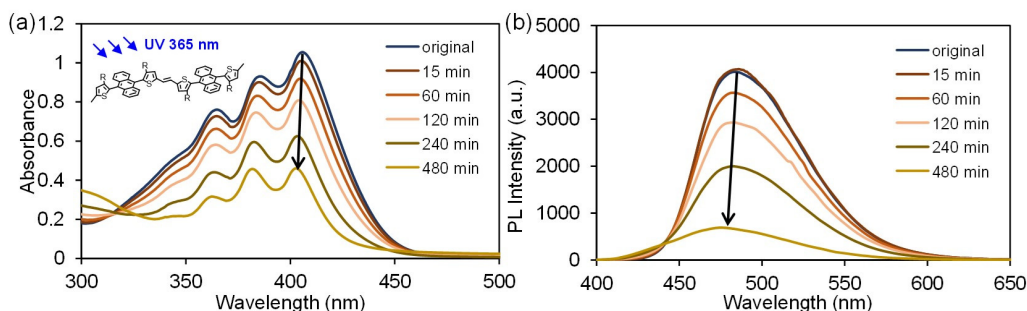

**Fig. S33** (a) Time-dependent UV-vis spectra of **5** in benzene solution after irradiation at 365 nm. (b) Time-dependent PL spectra of **5** after irradiation at 365 nm. A mercury UV lamp (365 nm,  $4 \text{ W cm}^{-2}$ ) was used.

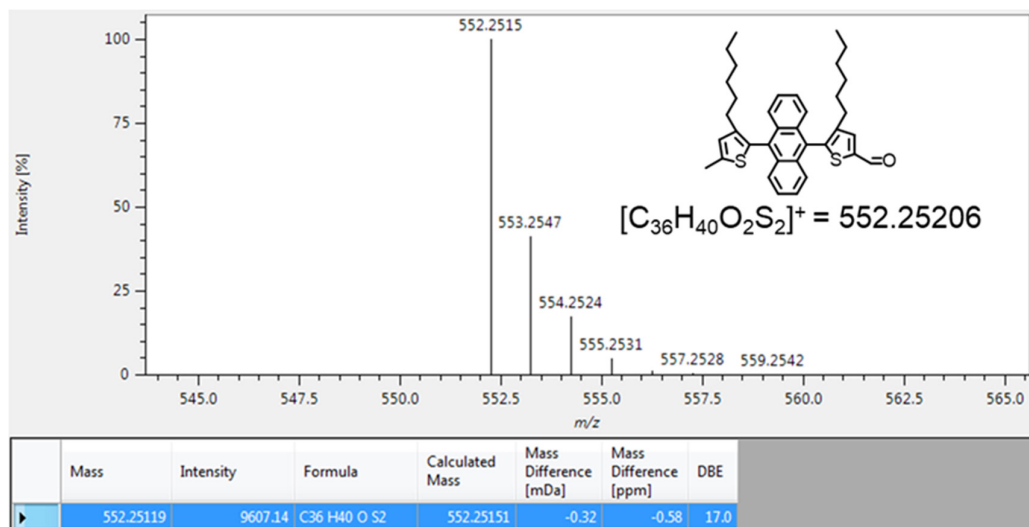

**Fig. S34** HRFD of **5** after irradiation to its benzene solution at 365 nm for 8 hours. Fragmentation occurred.

### 3-4 Compound 6 in benzene solution

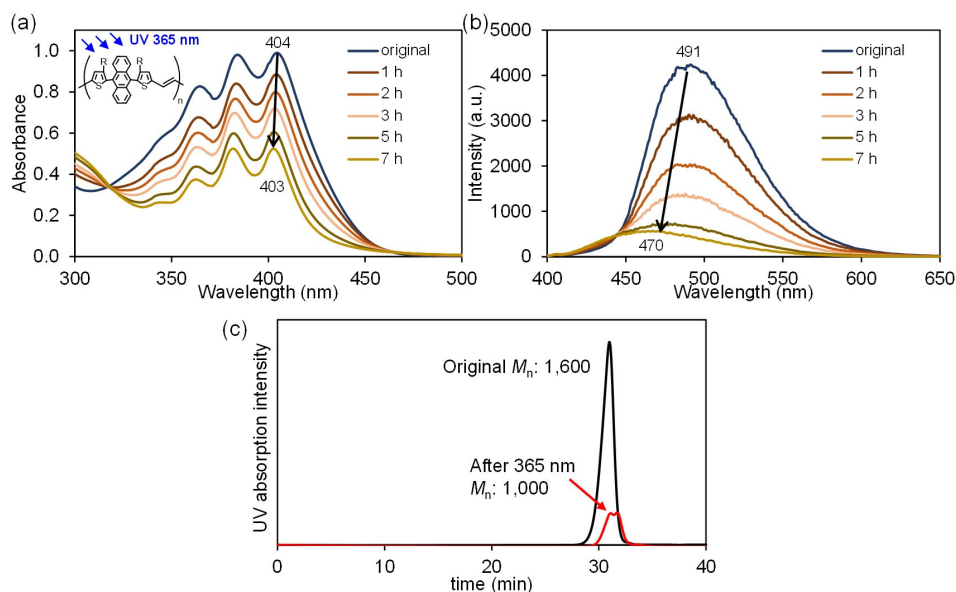

**Fig. S35** (a) Time-dependent UV-vis spectra of **6** in benzene solution before and after irradiation at 365 nm. (b) Time-dependent PL spectra of **6** before and after irradiation at 365 nm. A mercury UV lamp (365 nm, 4 W cm<sup>-2</sup>) was used. (c) GPC curves of **6** before and after photoirradiation.  $M_n$  significantly decreased after irradiation.

### 3-5 Compound 7 in benzene solution

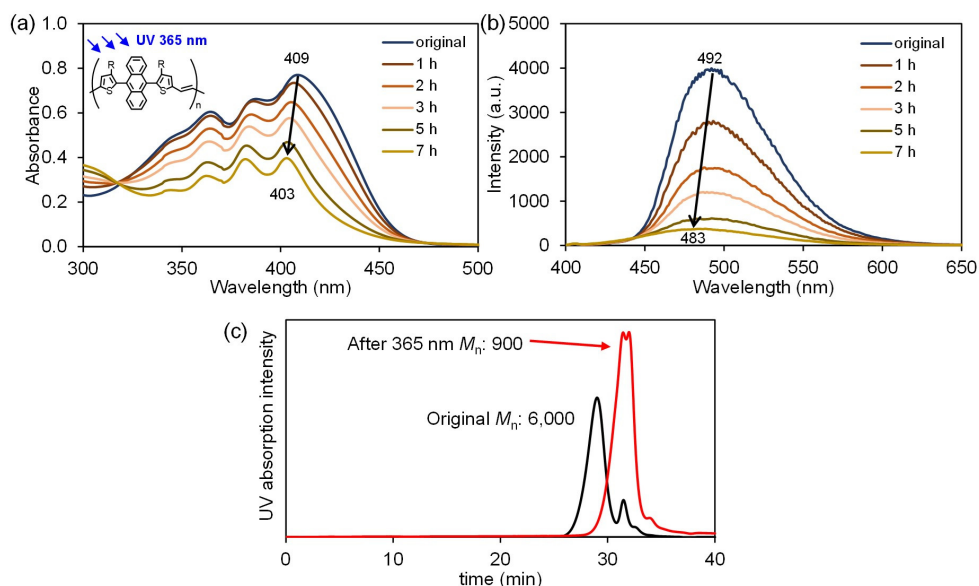

**Fig. S36** (a) Time-dependent UV-vis spectra of **7** in benzene solution before and after irradiation at 365 nm. (b) Time-dependent PL spectra of **7** before and after irradiation at 365 nm. A mercury UV lamp (365 nm, 4 W cm<sup>-2</sup>) was used. (c) GPC curves of **7** before and after photoirradiation.  $M_n$  significantly decreased after irradiation.



### 3-6 Compound **8** in benzene solution

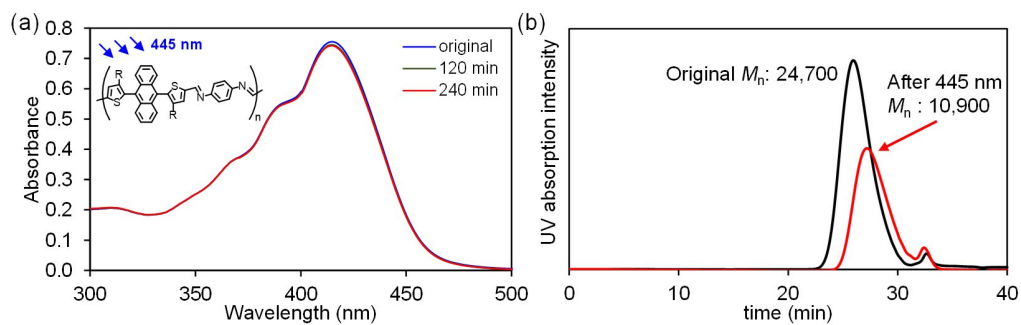

**Fig. S37** (a) Time-dependent UV-vis spectra of **8** in benzene solution before and after irradiation at 365 nm. A 445-nm laser ( $7.7 \text{ mW cm}^{-2}$ ) was used. (b) GPC curves of **8** before and after photoirradiation.  $M_n$  significantly decreased after irradiation.

## 4. Photoirradiation to free-standing films

### 4-1 Free-standing film of 8

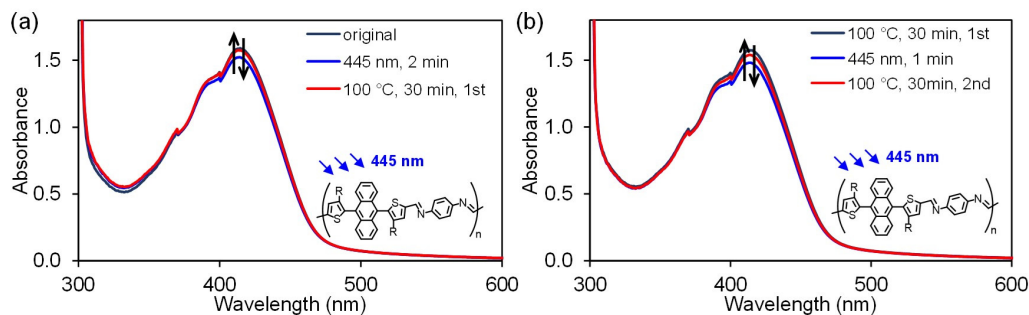

**Fig. S38** UV-vis spectra of thin film of **8** after irradiation using a 445-nm laser ( $0.26 \text{ W cm}^{-2}$ ) and heating at  $100 \text{ }^\circ\text{C}$ . (a) The first irradiation and heating at  $100 \text{ }^\circ\text{C}$ . (b) The second irradiation and heating at  $100 \text{ }^\circ\text{C}$ . Reversible change at absorption intensity around 420 nm was observed.

### 4-2 Free-standing film of 7

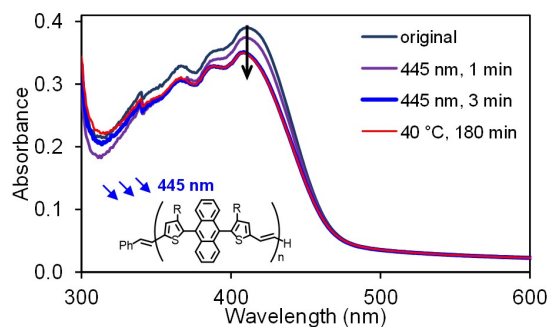

**Fig. S39** UV-vis spectra of thin film of **7** after irradiation using a 445-nm laser ( $0.26 \text{ W cm}^{-2}$ ) and heating at  $40 \text{ }^\circ\text{C}$ . Absorption intensity around 420 nm decreased.

## 5. Density functional calculations

### 5-1 Relative energies of **3**

**Table S2** Relative energies of conformers of **3** in gas phase. <sup>a</sup>

| Compound  | $\Delta H / \text{kJ mol}^{-1}$ | $\Delta G / \text{kJ mol}^{-1}$ |
|-----------|---------------------------------|---------------------------------|
| <b>3a</b> | 3.4                             | 3.0                             |
| <b>3b</b> | 0.0                             | 0.0                             |
| <b>3c</b> | 3.1                             | 0.6                             |
| <b>3d</b> | 1.4                             | 5.8                             |
| <b>3e</b> | 91.1                            | 92.7                            |

<sup>a</sup> Calculated by ORCA 5.0.0 or 5.0.1, r<sup>2</sup>SCAN-3c

**Table S3** Relative energies of conformers of **3** in gas benzene. <sup>a</sup>

| Compound  | $\Delta H / \text{kJ mol}^{-1}$ | $\Delta G / \text{kJ mol}^{-1}$ |
|-----------|---------------------------------|---------------------------------|
| <b>3a</b> | 0.0                             | 0.0                             |
| <b>3b</b> | 4.8                             | 5.1                             |
| <b>3c</b> | 11.5                            | 9.4                             |
| <b>3d</b> | 10.3                            | 15.1                            |
| <b>3e</b> | 86.3                            | 88.2                            |

<sup>a</sup> Calculated by ORCA 5.0.0 or 5.0.1, (SMD-)r<sup>2</sup>SCAN-3c

## 5-2 Estimated UV-Vis spectra of 3

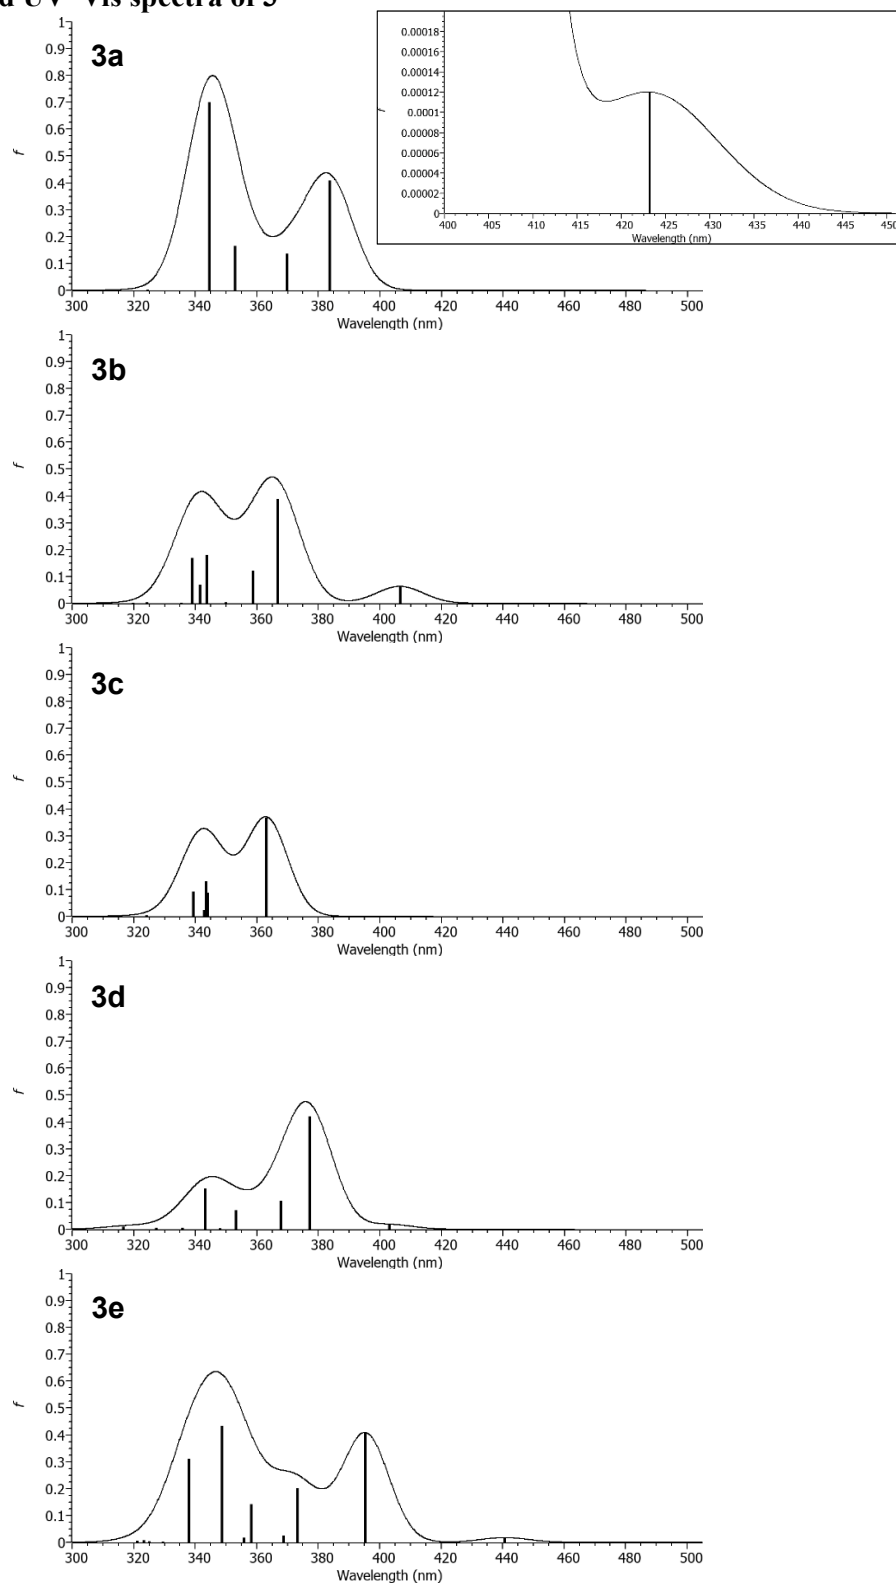

**Fig. S40** UV-vis spectra of **3a-3e** calculated by ORCA 5.0.1, TDA-CAMh-B3LYP/def2-TZVP(-f)//r<sup>2</sup>SCAN-3c. The spectra were broadened by Gaussian function (band width at 1/2 height was set to 18) using ChemCraft version 1.8.

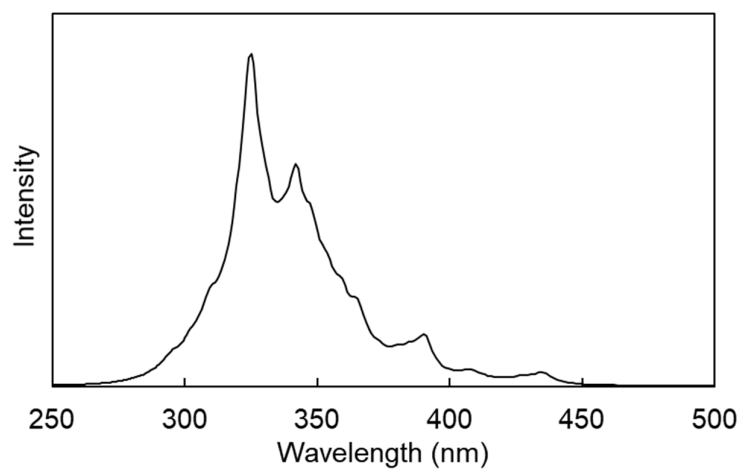

**Fig. S41** Vibrational effect corrected UV-vis spectrum of **3a** calculated by VG method with DO approximation implemented in ORCA 5.0.1, TDA-CAMh-B3LYP/def2-SVP //r2SCAN-3c. The spectra were broadened by Voigt function ( $180\text{ cm}^{-1}$ )

### 5-3 Detailed results of TD-DFT calculations of 3

**Table S4** Calculated photophysical properties of **3a** at CAMh-B3LYP/def2-TZVP(-f)//r<sup>2</sup>SCAN-3c.

| State | Wavelength (nm) | Oscillator strength | Assignment      | Ratio |
|-------|-----------------|---------------------|-----------------|-------|
| 1     | 423             | 0.00012             | HOMO → LUMO     | 0.67  |
|       |                 |                     | HOMO-2 → LUMO+1 | 0.14  |
| 2     | 384             | 0.41                | HOMO → LUMO+1   | 0.81  |
|       |                 |                     | HOMO-2 → LUMO   | 0.12  |
| 3     | 370             | 0.14                | HOMO-1 → LUMO+1 | 0.89  |
| 4     | 363             | 0.0000095           | HOMO-1 → LUMO   | 0.88  |
| 5     | 359             | 0.00024             | HOMO → LUMO+3   | 0.21  |
|       |                 |                     | HOMO → LUMO     | 0.18  |
|       |                 |                     | HOMO-2 → LUMO+1 | 0.15  |
| 6     | 353             | 0.16                | HOMO-2 → LUMO   | 0.55  |
|       |                 |                     | HOMO-3 → LUMO+1 | 0.29  |
| 7     | 345             | 0.70                | HOMO → LUMO+2   | 0.74  |
|       |                 |                     | HOMO-1 → LUMO+3 | 0.18  |
| 8     | 340             | 0.00096             | HOMO → LUMO+3   | 0.47  |
|       |                 |                     | HOMO-2 → LUMO+1 | 0.32  |
| 9     | 327             | 0.00075             | HOMO-2 → LUMO+3 | 0.35  |
|       |                 |                     | HOMO-3 → LUMO+1 | 0.26  |
| 10    | 324             | 0.0028              | HOMO-3 → LUMO   | 0.52  |
|       |                 |                     | HOMO-2 → LUMO+1 | 0.11  |
|       |                 |                     | HOMO-1 → LUMO+2 | 0.13  |
|       |                 |                     | HOMO → LUMO     | 0.10  |
| 11    | 322             | 0.00068             | HOMO-2 → LUMO+4 | 0.19  |
|       |                 |                     | HOMO-5 → LUMO   | 0.17  |
|       |                 |                     | HOMO → LUMO+5   | 0.15  |
|       |                 |                     | HOMO-4 → LUMO+1 | 0.13  |
| 12    | 320             | 0.000010            | HOMO-2 → LUMO+2 | 0.91  |

**Table S5** Calculated photophysical properties of **3b** at CAMh-B3LYP/def2-TZVP(-f)//r<sup>2</sup>SCAN-3c.

| State | Wavelength (nm) | Oscillator strength | Assignment      | Ratio |
|-------|-----------------|---------------------|-----------------|-------|
| 1     | 407             | 0.063               | HOMO → LUMO     | 0.72  |
| 2     | 367             | 0.39                | HOMO-1 → LUMO+1 | 0.40  |
|       |                 |                     | HOMO-1 → LUMO   | 0.27  |
|       |                 |                     | HOMO → LUMO     | 0.11  |
| 3     | 359             | 0.12                | HOMO-2 → LUMO   | 0.87  |
| 4     | 352             | 0.00085             | HOMO → LUMO+1   | 0.68  |
|       |                 |                     | HOMO-3 → LUMO+1 | 0.13  |
| 5     | 350             | 0.0048              | HOMO-1 → LUMO   | 0.44  |
|       |                 |                     | HOMO-3 → LUMO   | 0.21  |
| 6     | 344             | 0.18                | HOMO → LUMO+2   | 0.25  |
|       |                 |                     | HOMO-2 → LUMO+1 | 0.50  |
| 7     | 342             | 0.068               | HOMO-3 → LUMO   | 0.46  |
|       |                 |                     | HOMO-1 → LUMO+1 | 0.19  |
|       |                 |                     | HOMO-1 → LUMO   | 0.18  |
| 8     | 339             | 0.17                | HOMO-2 → LUMO+1 | 0.38  |
|       |                 |                     | HOMO → LUMO+2   | 0.31  |
|       |                 |                     | HOMO-2 → LUMO+3 | 0.17  |
| 9     | 336             | 0.0016              | HOMO → LUMO+3   | 0.35  |
|       |                 |                     | HOMO-3 → LUMO   | 0.20  |
|       |                 |                     | HOMO-2 → LUMO+2 | 0.16  |
|       |                 |                     | HOMO-1 → LUMO+1 | 0.12  |
| 10    | 324             | 0.0032              | HOMO-1 → LUMO+2 | 0.84  |
| 11    | 320             | 0.00024             | HOMO-1 → LUMO+3 | 0.67  |
|       |                 |                     | HOMO-3 → LUMO+1 | 0.15  |
| 12    | 320             | 0.0016              | HOMO-3 → LUMO+1 | 0.29  |
|       |                 |                     | HOMO-1 → LUMO+3 | 0.22  |
|       |                 |                     | HOMO → LUMO+3   | 0.16  |
|       |                 |                     | HOMO-3 → LUMO+3 | 0.12  |

**Table S6** Calculated photophysical properties of **3c** at CAMh-B3LYP/def2-TZVP(-f)//r<sup>2</sup>SCAN-3c.

| State | Wavelength (nm) | Oscillator strength | Assignment      | Ratio |
|-------|-----------------|---------------------|-----------------|-------|
| 1     | 384             | 0.000000001         | HOMO → LUMO+1   | 0.43  |
|       |                 |                     | HOMO-1 → LUMO   | 0.28  |
|       |                 |                     | HOMO-2 → LUMO+3 | 0.13  |
|       |                 |                     | HOMO-3 → LUMO+2 | 0.13  |
| 2     | 363             | 0.37                | HOMO → LUMO     | 0.86  |
| 3     | 347             | 0.00000010          | HOMO-1 → LUMO   | 0.48  |
|       |                 |                     | HOMO → LUMO+1   | 0.43  |
| 4     | 344             | 0.00000022          | HOMO-2 → LUMO   | 0.84  |
| 5     | 344             | 0.089               | HOMO-1 → LUMO+1 | 0.38  |
|       |                 |                     | HOMO-2 → LUMO+1 | 0.26  |
| 6     | 344             | 0.13                | HOMO-1 → LUMO+1 | 0.38  |
|       |                 |                     | HOMO-3 → LUMO   | 0.21  |
|       |                 |                     | HOMO-2 → LUMO+2 | 0.14  |
|       |                 |                     | HOMO-3 → LUMO+3 | 0.13  |
| 7     | 343             | 0.024               | HOMO-3 → LUMO   | 0.60  |
|       |                 |                     | HOMO-2 → LUMO+1 | 0.17  |
| 8     | 340             | 0.00000020          | HOMO-3 → LUMO+1 | 0.84  |
| 9     | 339             | 0.092               | HOMO-2 → LUMO+1 | 0.43  |
|       |                 |                     | HOMO-2 → LUMO+2 | 0.20  |
|       |                 |                     | HOMO-3 → LUMO+3 | 0.17  |
| 10    | 337             | 0.00000031          | HOMO-3 → LUMO+2 | 0.32  |
|       |                 |                     | HOMO-2 → LUMO+3 | 0.31  |
|       |                 |                     | HOMO-1 → LUMO   | 0.15  |
| 11    | 326             | 0.000000002         | HOMO → LUMO+2   | 0.92  |
| 12    | 324             | 0.0048              | HOMO → LUMO+3   | 0.92  |



**Table S7** Calculated photophysical properties of **3d** at CAMh-B3LYP/def2-TZVP(-f)//r<sup>2</sup>SCAN-3c.

| State | Wavelength (nm) | Oscillator strength | Assignment      | Ratio |
|-------|-----------------|---------------------|-----------------|-------|
| 1     | 403             | 0.018               | HOMO-1 → LUMO   | 0.54  |
|       |                 |                     | HOMO → LUMO+1   | 0.28  |
| 2     | 377             | 0.42                | HOMO → LUMO     | 0.40  |
|       |                 |                     | HOMO → LUMO+1   | 0.29  |
|       |                 |                     | HOMO-1 → LUMO   | 0.25  |
| 3     | 368             | 0.11                | HOMO → LUMO     | 0.56  |
|       |                 |                     | HOMO → LUMO+1   | 0.31  |
| 4     | 353             | 0.071               | HOMO-2 → LUMO   | 0.75  |
|       |                 |                     | HOMO-1 → LUMO+1 | 0.10  |
| 5     | 348             | 0.0032              | HOMO-1 → LUMO+1 | 0.55  |
|       |                 |                     | HOMO-2 → LUMO+1 | 0.24  |
|       |                 |                     | HOMO-2 → LUMO   | 0.11  |
| 6     | 343             | 0.15                | HOMO-1 → LUMO+2 | 0.44  |
|       |                 |                     | HOMO-2 → LUMO+2 | 0.28  |
| 7     | 336             | 0.0057              | HOMO → LUMO+2   | 0.87  |
| 8     | 330             | 0.00078             | HOMO-3 → LUMO   | 0.72  |
| 9     | 327             | 0.0064              | HOMO-2 → LUMO+1 | 0.52  |
|       |                 |                     | HOMO-1 → LUMO+1 | 0.25  |
|       |                 |                     | HOMO-3 → LUMO   | 0.11  |
| 10    | 323             | 0.00090             | HOMO → LUMO+5   | 0.22  |
|       |                 |                     | HOMO-8 → LUMO+1 | 0.19  |
|       |                 |                     | HOMO-4 → LUMO+1 | 0.13  |
|       |                 |                     | HOMO → LUMO+6   | 0.12  |
| 11    | 321             | 0.00062             | HOMO-9 → LUMO   | 0.35  |
|       |                 |                     | HOMO-1 → LUMO+4 | 0.35  |
| 12    | 317             | 0.0095              | HOMO-2 → LUMO+2 | 0.47  |
|       |                 |                     | HOMO-1 → LUMO+2 | 0.39  |

**Table S8** Calculated photophysical properties of **3e** at CAMh-B3LYP/def2-TZVP(-f)//r<sup>2</sup>SCAN-3c.

| State | Wavelength (nm) | Oscillator strength | Assignment      | Ratio |
|-------|-----------------|---------------------|-----------------|-------|
| 1     | 441             | 0.018               | HOMO → LUMO     | 0.74  |
|       |                 |                     | HOMO-1 → LUMO+1 | 0.11  |
| 2     | 395             | 0.41                | HOMO → LUMO+1   | 0.79  |
| 3     | 373             | 0.2                 | HOMO-2 → LUMO   | 0.84  |
| 4     | 369             | 0.024               | HOMO-2 → LUMO+1 | 0.78  |
|       |                 |                     | HOMO-1 → LUMO+1 | 0.11  |
| 5     | 358             | 0.14                | HOMO-1 → LUMO   | 0.41  |
|       |                 |                     | HOMO-3 → LUMO+1 | 0.18  |
| 6     | 356             | 0.016               | HOMO-3 → LUMO   | 0.22  |
|       |                 |                     | HOMO-1 → LUMO   | 0.19  |
|       |                 |                     | HOMO-1 → LUMO+1 | 0.12  |
|       |                 |                     | HOMO → LUMO     | 0.10  |
|       |                 |                     | HOMO → LUMO+3   | 0.10  |
| 7     | 349             | 0.43                | HOMO → LUMO+2   | 0.51  |
|       |                 |                     | HOMO-1 → LUMO+1 | 0.23  |
| 8     | 338             | 0.31                | HOMO → LUMO+3   | 0.53  |
|       |                 |                     | HOMO → LUMO+2   | 0.18  |
|       |                 |                     | HOMO-1 → LUMO+1 | 0.10  |
| 9     | 330             | 0.0015              | HOMO-3 → LUMO+1 | 0.18  |
|       |                 |                     | HOMO-1 → LUMO+3 | 0.16  |
|       |                 |                     | HOMO-3 → LUMO   | 0.12  |
| 10    | 325             | 0.0039              | HOMO-1 → LUMO+4 | 0.14  |
|       |                 |                     | HOMO-7 → LUMO   | 0.13  |
|       |                 |                     | HOMO → LUMO+5   | 0.12  |
| 11    | 323             | 0.0082              | HOMO-3 → LUMO   | 0.29  |
|       |                 |                     | HOMO-1 → LUMO+5 | 0.11  |
| 12    | 321             | 0.0056              | HOMO-1 → LUMO+2 | 0.32  |
|       |                 |                     | HOMO-3 → LUMO   | 0.14  |
|       |                 |                     | HOMO-3 → LUMO+1 | 0.12  |

### 5-4 Molecular orbitals of 3

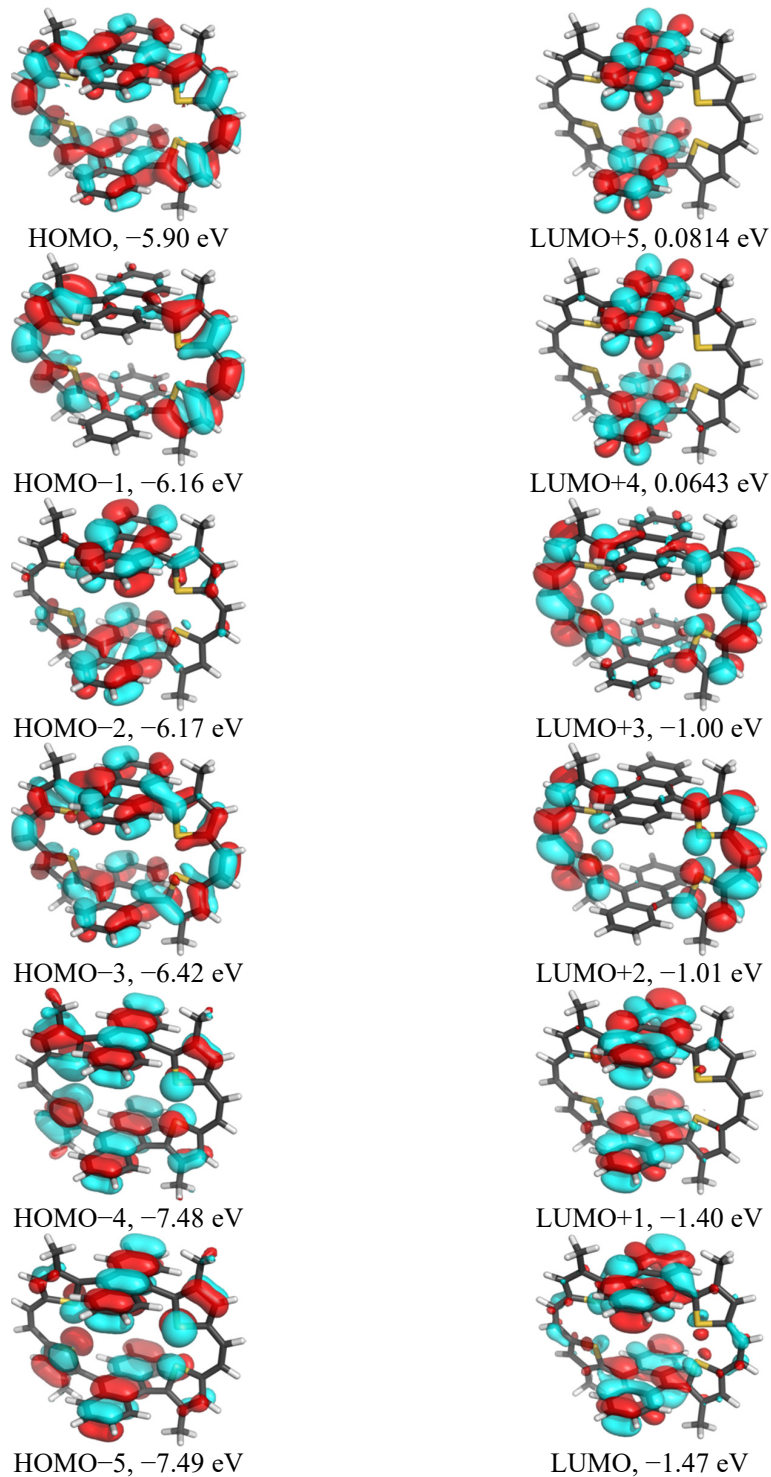

**Fig. S42** Molecular orbitals (Kohn–Sham orbitals) of **3a** calculated at CAMh-B3LYP/def2-TZVP(-f)/r<sup>2</sup>SCAN-3c.

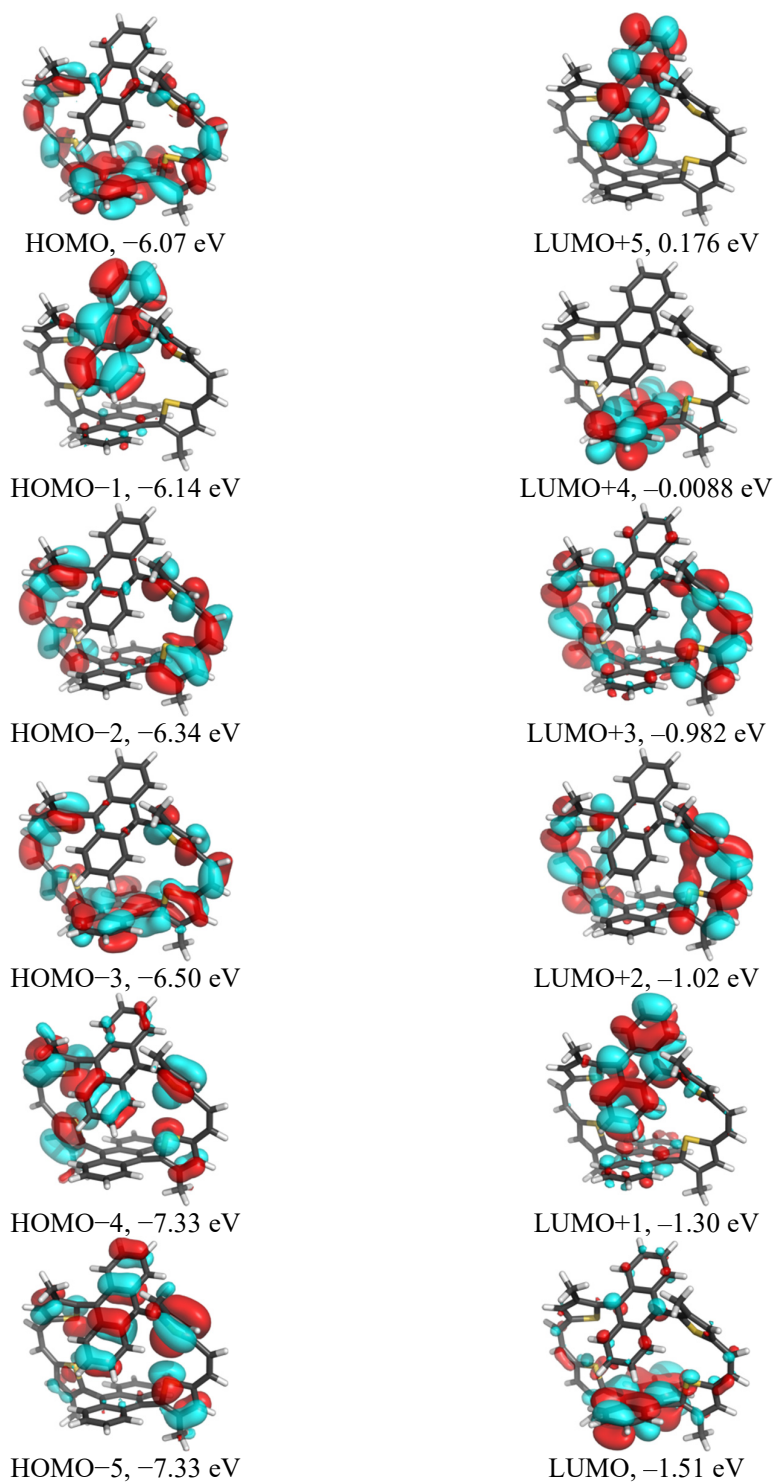

**Fig. S43** Molecular orbitals (Kohn–Sham orbitals) of **3b** calculated at CAMh-B3LYP/def2-TZVP(-f)/r<sup>2</sup>SCAN-3c.

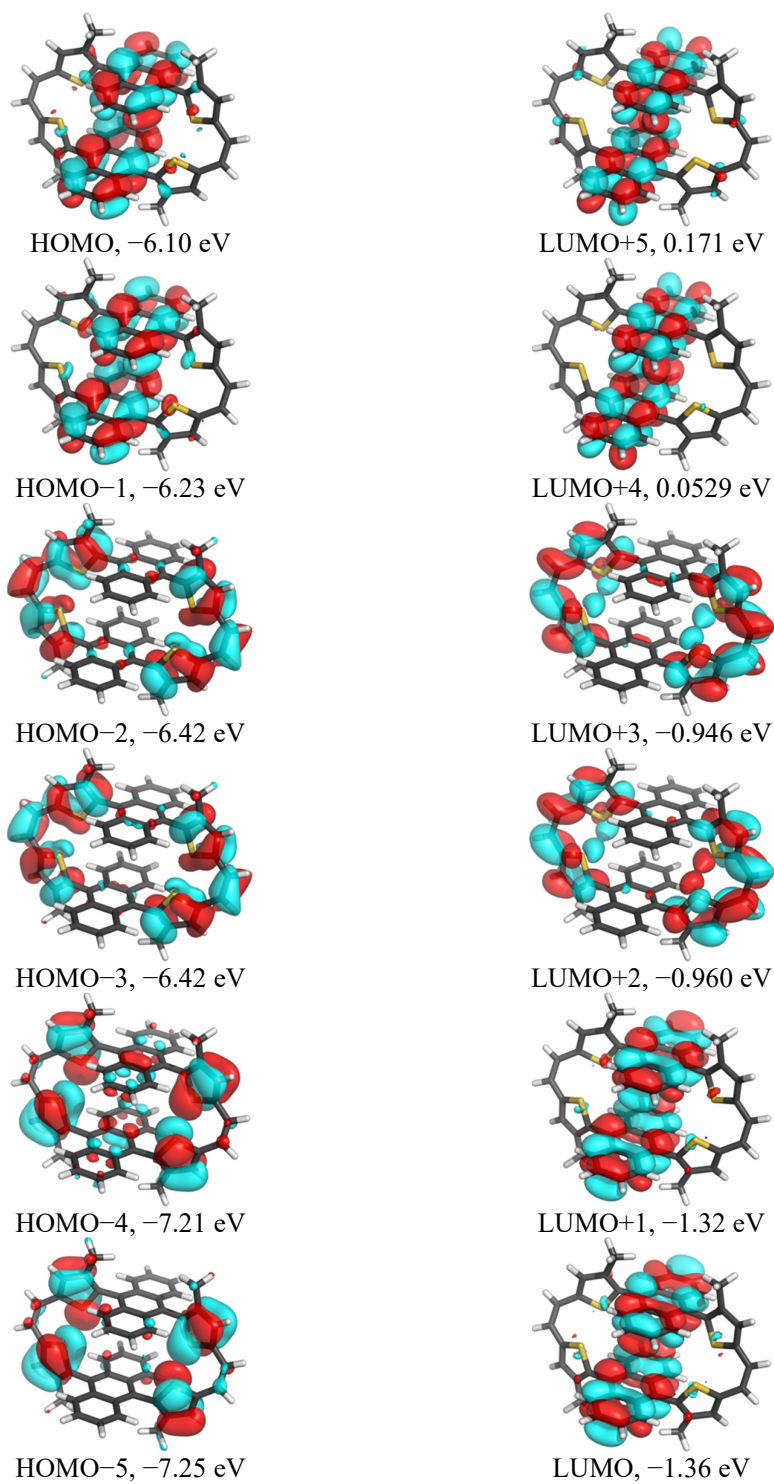

**Fig. S44** Molecular orbitals (Kohn–Sham orbitals) of **3c** calculated at CAMh-B3LYP/def2-TZVP(-f)/r<sup>2</sup>SCAN-3c.

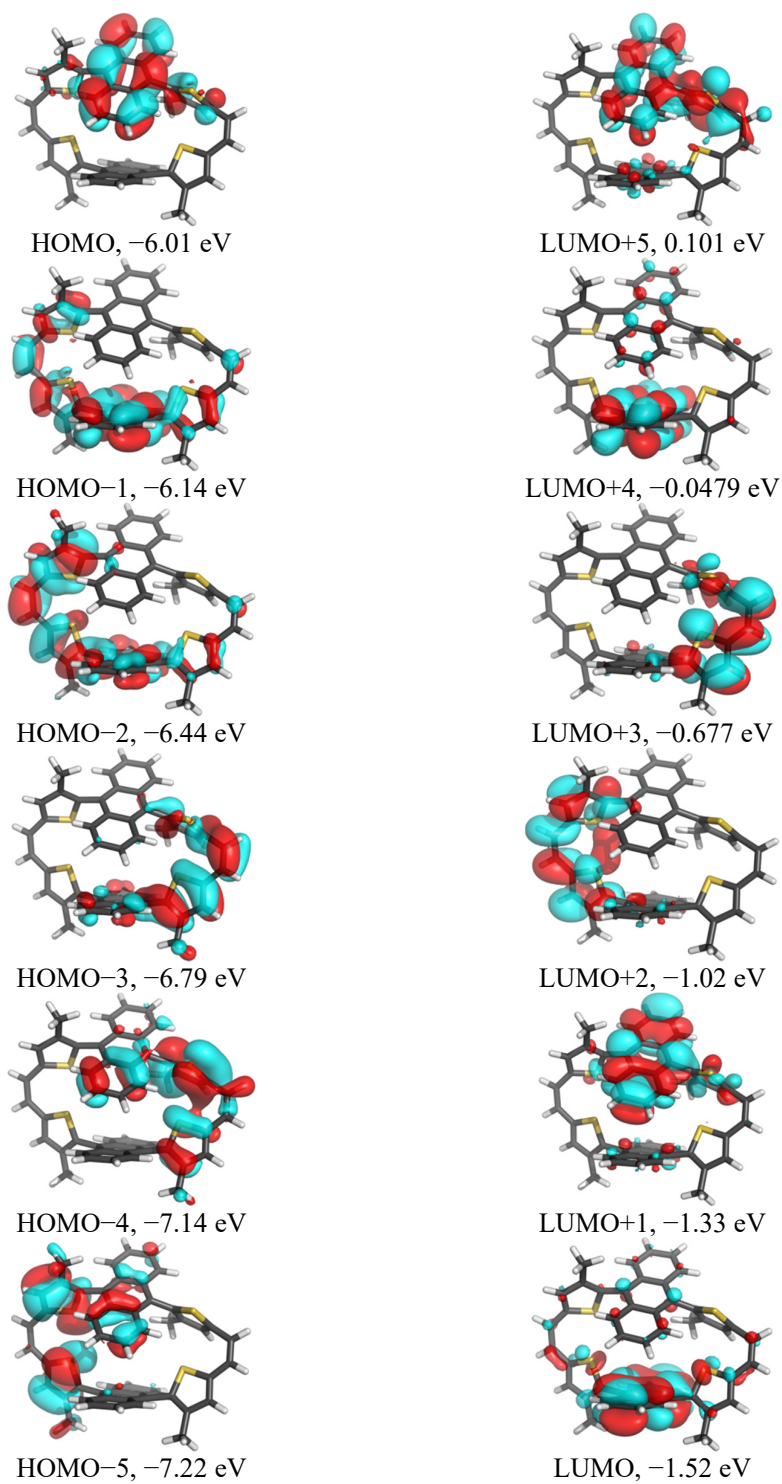

**Fig. S45** Molecular orbitals (Kohn–Sham orbitals) of **3d** calculated at CAMh-B3LYP/def2-TZVP(-f)/r<sup>2</sup>SCAN-3c.

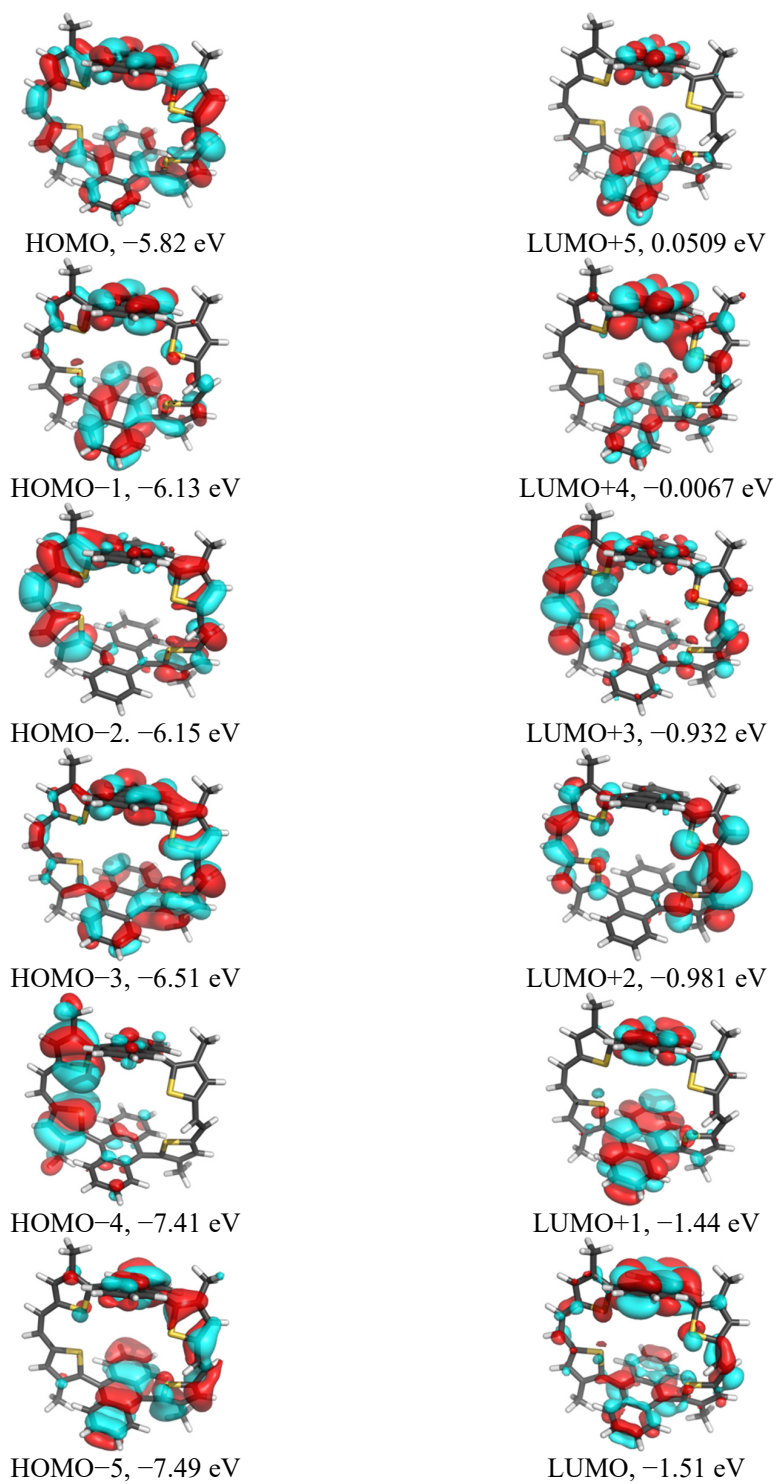

**Fig. S46** Molecular orbitals (Kohn–Sham orbitals) of **3e** calculated at CAMh-B3LYP/def2-TZVP(-f)/r<sup>2</sup>SCAN-3c.

### 5-5 Activation energy of 3

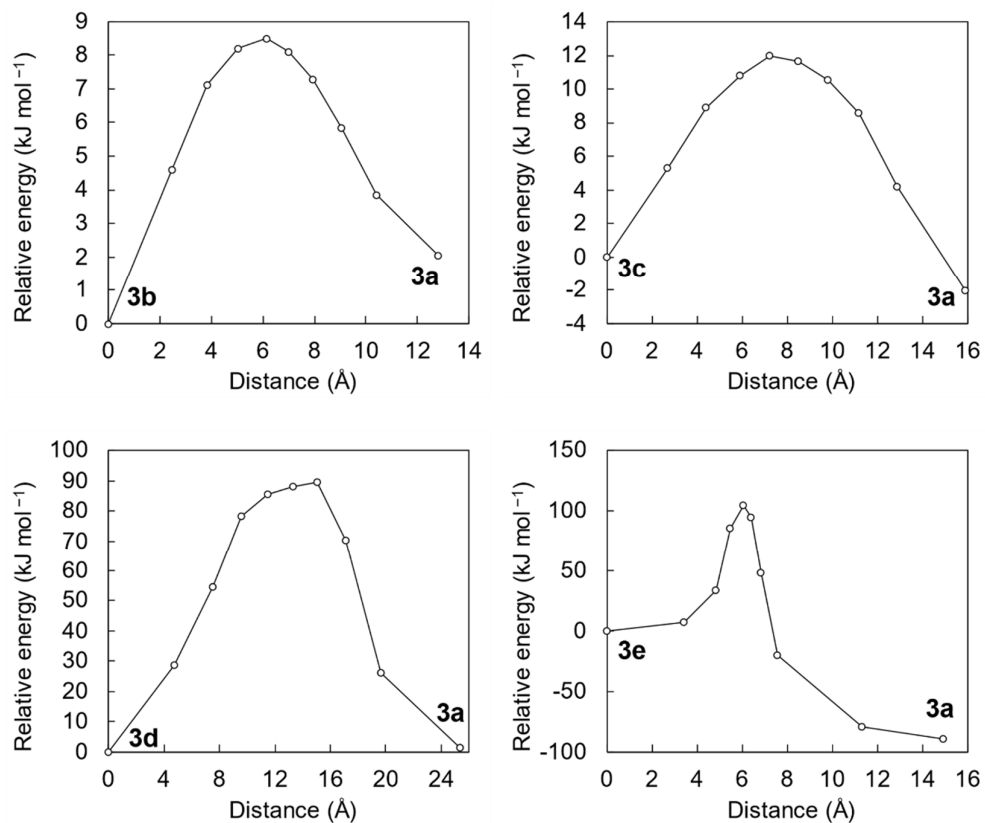

**Fig. S47** Activation energies between conformers **3a-3e** calculated by EW-CI-NEB method using ORCA 5.0.1 at the  $r^2\text{SCAN-3c}$  for **3a-3d** and  $U\text{-}r^2\text{SCAN-3c}$  for **3e**.



## 6. Force measurements

### 6-1 Single-crystal of **3**

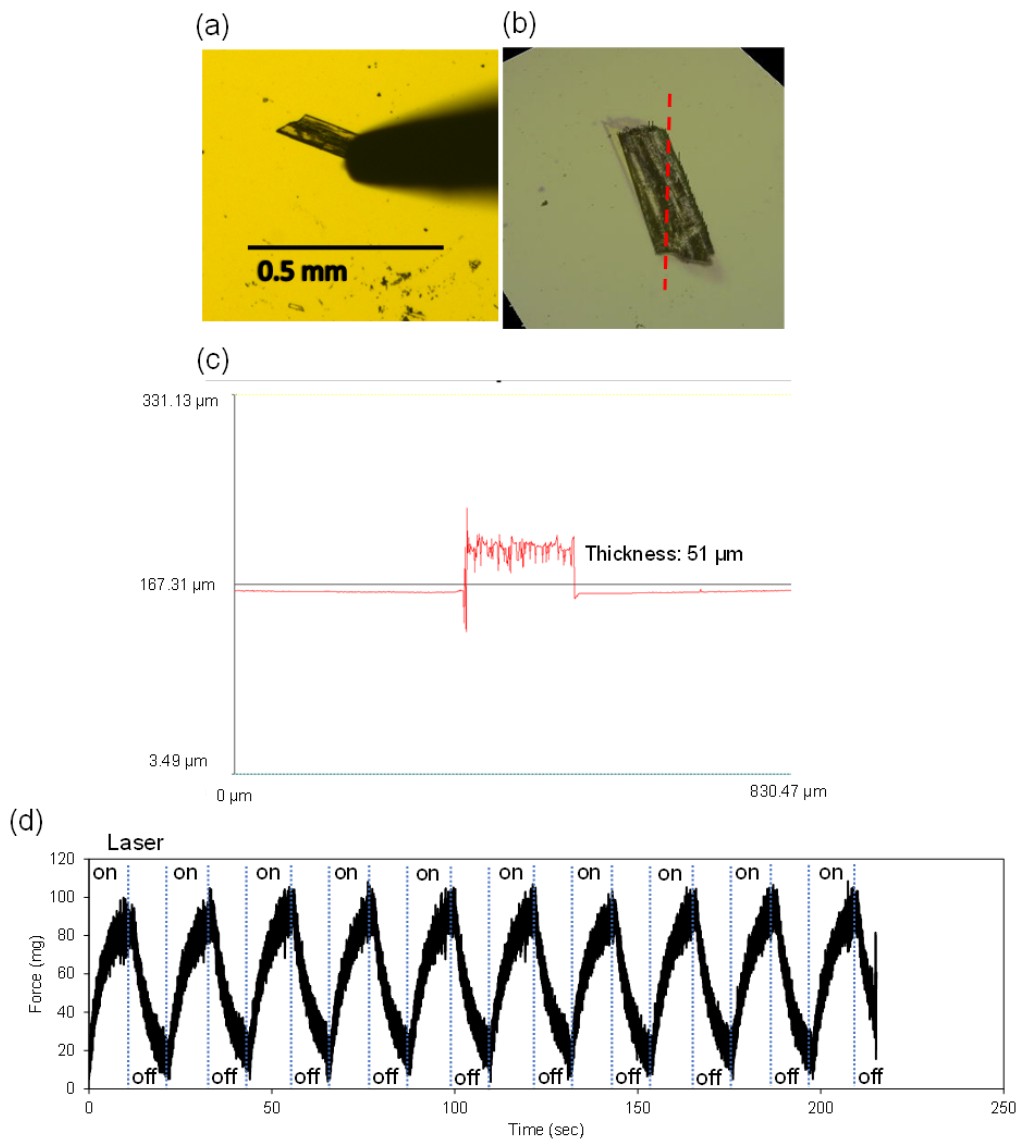

**Fig. S48** (a) Optical micrograph of a single-crystal of **3**. (b) Confocal microscopic image and (c) its cross section. (d) Time-dependent force detection produced by the single-crystal of **3** induced by 445-nm laser irradiation ( $0.18 \text{ W cm}^{-2}$ ) on/off.

## 6-2 Free-standing film of 7

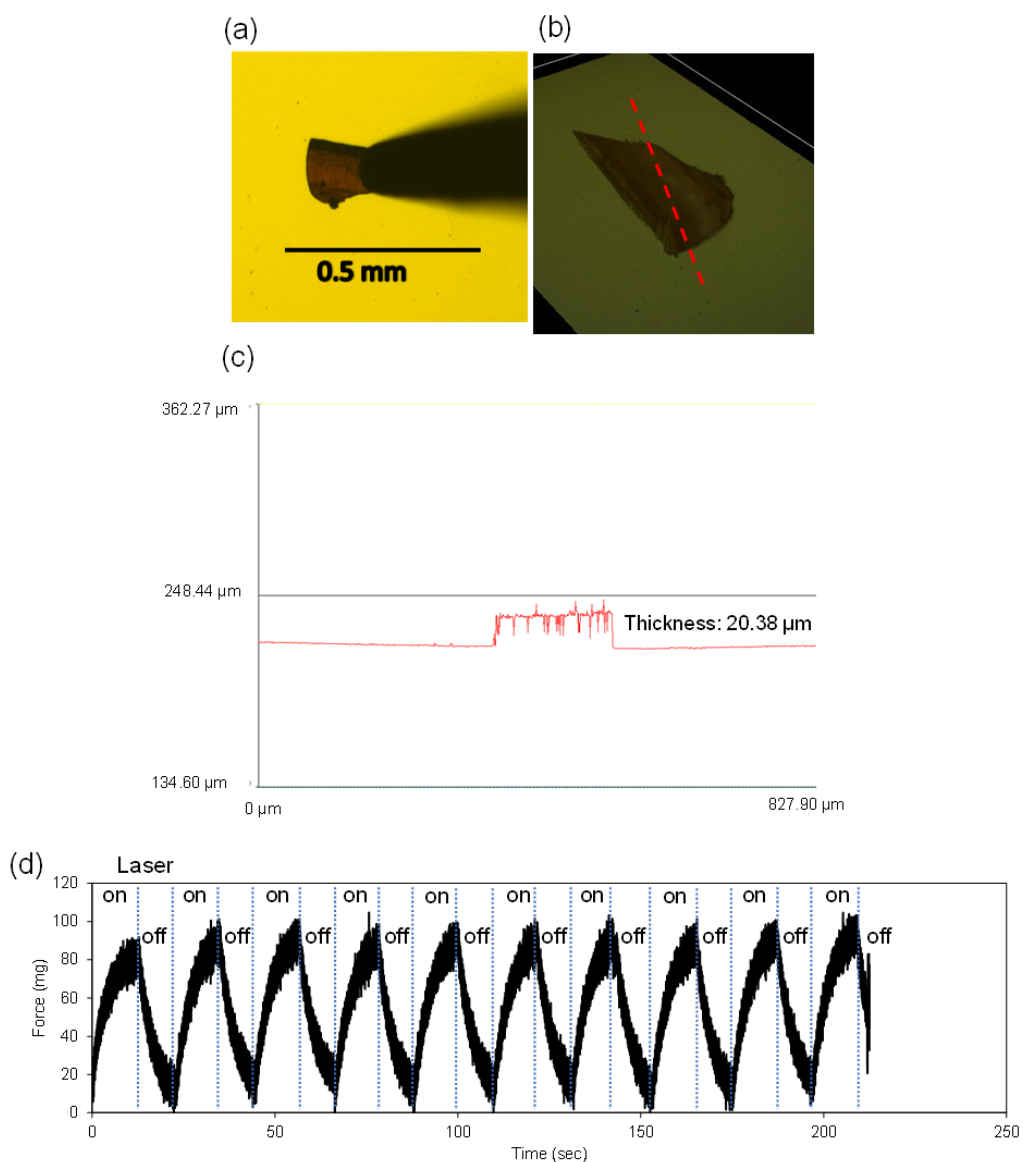

**Fig. S49** (a) Optical micrograph of a free-standing film of 7. (b) Confocal microscopic image and (c) its cross section. (d) Time-dependent force detection produced by the film of 7 induced by 445-nm laser irradiation ( $0.18 \text{ W cm}^{-2}$ ) on/off

### 6-3 Free-standing film of **8**

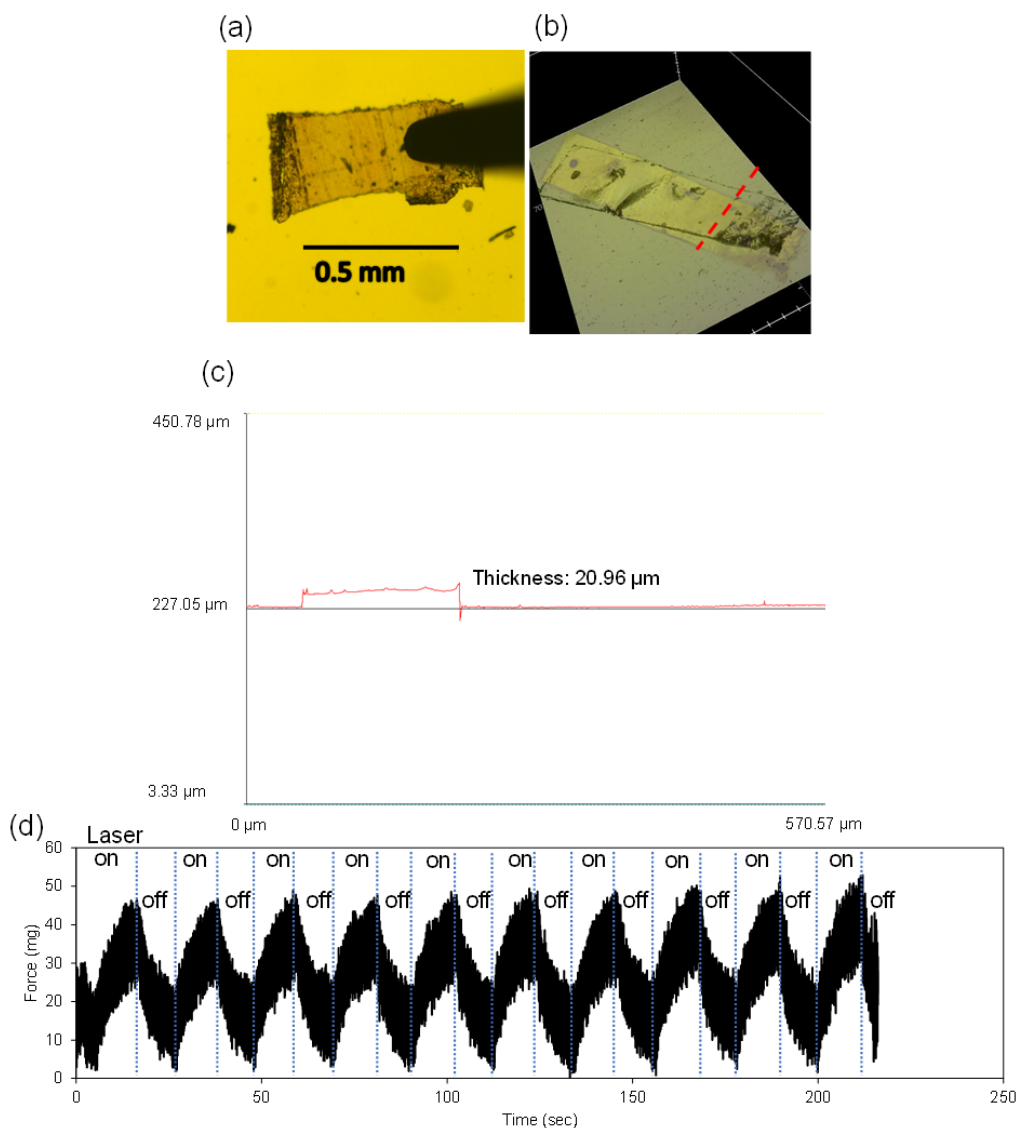

**Fig. S50** (a) Optical micrograph of a free-standing film of **8**. (b) Confocal microscopic image and (c) its cross section. (d) Time-dependent force detection produced by the film of **7** induced by 445-nm laser irradiation ( $0.23 \text{ W cm}^{-2}$ ) on/off.

## 7. DSC

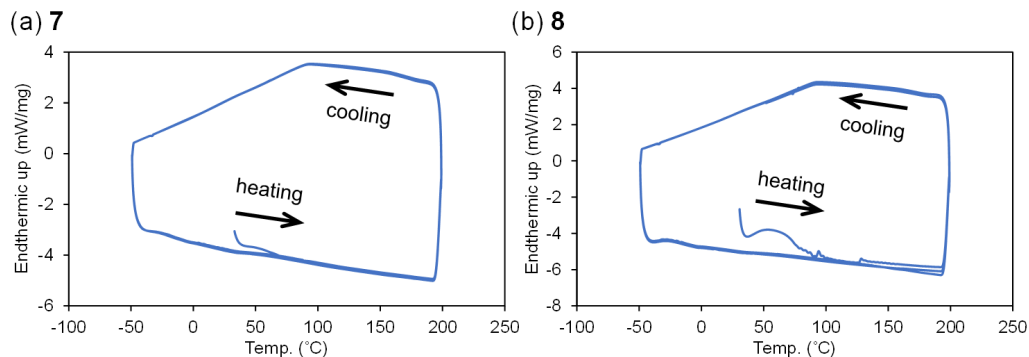

**Fig. S51** DSC charts of a piece of a free-standing film of (a) **7** and (b) **8**. An endothermic signal was observed at 47 °C and 51 °C for **7** and **8**, respectively, in the first heating scan.

## 8. X-ray diffraction

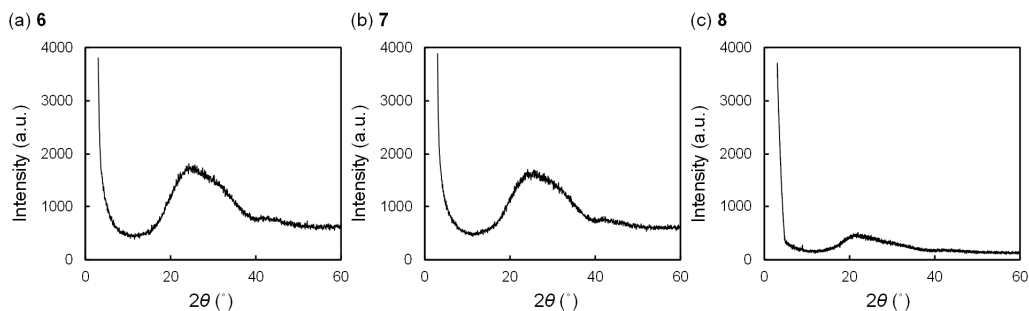

**Fig. S52** X-ray diffraction patterns of a drop-casted film of (a) **6**, (b) **7**, and (b) **8** on a glass substrate. A broad and weak peak was observed at  $2\theta = 25^\circ$ ,  $25^\circ$ , and  $22^\circ$  for **6**, **7**, and **8**, respectively, suggesting less crystalline or amorphous properties of the polymers.

## 9. Polarized optical microscopy

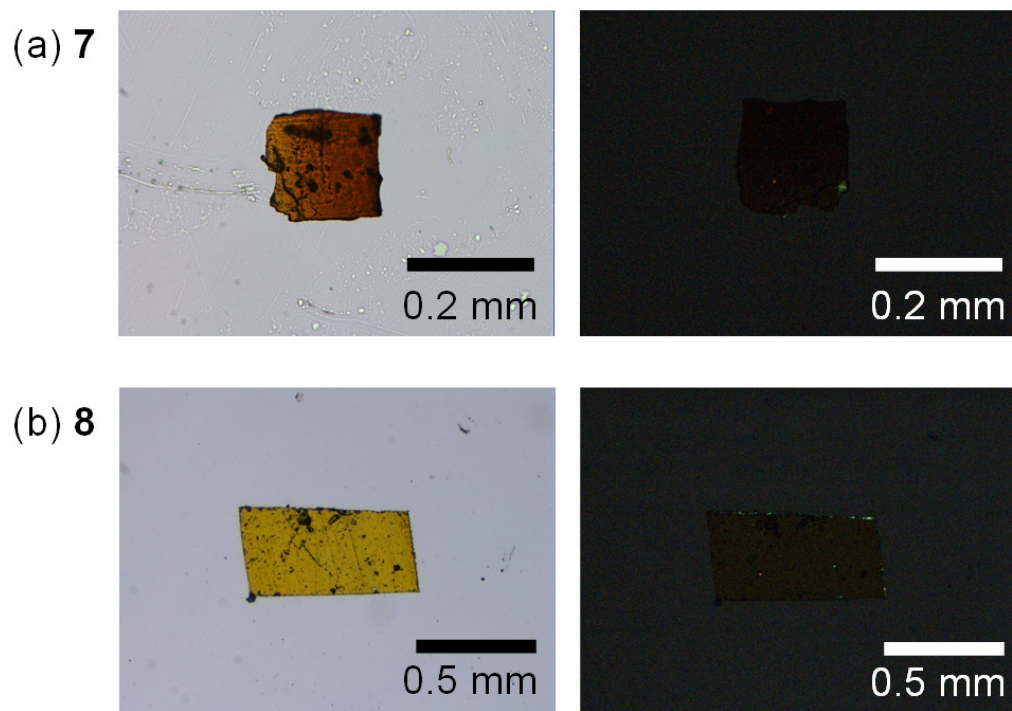

**Fig. S53** (a) Optical micrographs of a free-standing film of (a) **7** and (b) **8** without (left) and with polarized light (right). Ordered structures or crystalline domains were not observed in these films.

## 10. Cartesian coordinate of the optimized structure

### 3a, r<sup>2</sup>SCAN-3c geometry

|   |                   |                   |                   |
|---|-------------------|-------------------|-------------------|
| S | -0.27976393862800 | 2.97022911680723  | -1.91003622721151 |
| S | -2.89737562939444 | 1.41490801542630  | -1.46869210478888 |
| S | 2.74367638759501  | -1.19467422852963 | 1.89934527295904  |
| S | 0.43251152176716  | -3.18667847290998 | 1.48348790539492  |
| C | -2.20969679671895 | -3.16969018322497 | -0.58206017776082 |
| C | -2.88620703417636 | -2.19690879292228 | -1.40218681825661 |
| C | 2.93307114811517  | 2.13615995502162  | -1.44150640693311 |
| C | 2.23864249477130  | 3.12092750975889  | 0.68176960329760  |
| C | 3.65082950782522  | 1.10412892915846  | -0.73665830770933 |
| C | 1.13833873803243  | 3.86632872178004  | -1.42881152731160 |
| C | -2.99631343567334 | -2.03704601145818 | 1.43257983818828  |
| C | 2.99323523873574  | 2.11491973569629  | 1.38603816059038  |
| C | 2.16947506003803  | 3.08113111313433  | -0.72633108456847 |
| C | 1.00098267850787  | -4.26629177511147 | 2.73307995307638  |
| C | -3.05844678870413 | -1.88627427850365 | 2.84734449392883  |
| H | -2.48191013662562 | -2.56533424491568 | 3.46672950587814  |
| C | -2.76660895106282 | -2.30552786567469 | -2.81711332768275 |
| H | -3.23255735804703 | -1.54578480455119 | -3.43605452805792 |
| C | -3.57976564148746 | -1.13208851878959 | -0.79072435489882 |
| C | -1.50815902272164 | -4.23065514258288 | -1.22310816191687 |
| H | -1.01775300476979 | -4.97359863661630 | -0.60171104230671 |
| C | -2.20429155061493 | -3.03068126367201 | 0.82082391248012  |
| C | -3.70948443904322 | -1.09066558923802 | 0.61237030504678  |
| C | -1.20831858070114 | -3.76529384518163 | 1.62207091135834  |
| C | 2.97096980762945  | 2.14063411701345  | -2.86531977836666 |
| H | 2.44647269679345  | 2.93207686083140  | -3.39171807957525 |
| C | -3.96722743737824 | 0.04202386004872  | -1.59400380867393 |
| C | 4.04128242479007  | -0.14800396415047 | 1.38358557909415  |
| C | 3.62028748413251  | 1.07319873694831  | 0.67295844986457  |
| C | -0.05917499599255 | -5.03774255857018 | 3.18162765507404  |
| H | 0.06810256835835  | -5.79665243862344 | 3.94839346891569  |
| C | 4.31130031754677  | 0.09887130740435  | -1.49926856964349 |
| H | 4.81027128325137  | -0.70683718518136 | -0.97101213024698 |
| C | -1.31069667585982 | -4.75186634174410 | 2.57512605743882  |
| C | -3.75238502151683 | 2.29328479297638  | -2.71274751664300 |

|   |                   |                   |                   |
|---|-------------------|-------------------|-------------------|
| C | -4.94400527840237 | 0.25504171027690  | -2.53870543485616 |
| C | 2.35831107253289  | -4.40652884048161 | 3.19618641751812  |
| H | 2.47412619938485  | -5.30718953847507 | 3.79847516775146  |
| C | -1.45854799558874 | -4.32395417953673 | -2.58586628918891 |
| H | -0.92925205654608 | -5.14822065106955 | -3.05487647719851 |
| C | 4.32297159755993  | 0.14095211459761  | -2.86580959043086 |
| H | 4.84109323404162  | -0.63143247351108 | -3.42683497949295 |
| C | -2.08285794684977 | -3.34065430736485 | -3.39194528111844 |
| H | -2.01241513024951 | -3.40847313111250 | -4.47370422029796 |
| C | 0.99050757538709  | 5.20973000219086  | -1.68505955022522 |
| C | -1.10261421144891 | 4.41221297087151  | -2.45167403334431 |
| C | 3.85203980115495  | -2.43439267139982 | 2.43290164811674  |
| C | -3.45784572825549 | 3.62314680307600  | -3.18290306974141 |
| H | -4.28134101280772 | 4.01808821127029  | -3.77728218600834 |
| C | -4.82414034281094 | 1.53120737313270  | -3.14958244952509 |
| H | -5.51056277065384 | 1.89009386227836  | -3.91122046215054 |
| C | 1.52162501965489  | 4.08554834443652  | 1.44562484574829  |
| H | 0.91180820471263  | 4.81312525419978  | 0.92027379914758  |
| C | 3.50493566351041  | -3.68919517978348 | 3.05059497042404  |
| H | 4.37866550875518  | -4.15559778330828 | 3.50495897466693  |
| C | 3.65739855836785  | 1.18263655213059  | -3.55758177878496 |
| H | 3.68476268095988  | 1.21174541372607  | -4.64293436798810 |
| C | 3.03970869618295  | 2.16991950672436  | 2.80851657777217  |
| H | 3.62586215487327  | 1.42229977221666  | 3.33394896117133  |
| C | 2.37494770568408  | 3.14318783193452  | 3.50063397496360  |
| H | 2.43416436113500  | 3.17556290430957  | 4.58462430905035  |
| C | -0.26671942725545 | 5.50343497199674  | -2.27583548055487 |
| H | -0.56588105287973 | 6.50703737503883  | -2.56449289562307 |
| C | -2.41037465288425 | 4.48135397111947  | -3.05268559595490 |
| H | -2.57888426175028 | 5.45624874309099  | -3.50939398146120 |
| C | 1.59449327809124  | 4.10319592827940  | 2.81086094733346  |
| H | 1.04670138517783  | 4.85435987048101  | 3.37251906582621  |
| C | -2.59503393836791 | -5.43875841219666 | 2.93199445041035  |
| H | -3.41642157526797 | -5.07535419723771 | 2.30867773404149  |
| H | -2.86068204112595 | -5.26284100926824 | 3.98103327921127  |
| C | 2.03456973796605  | 6.23986569875219  | -1.37271130167929 |
| H | 2.92408778833186  | 5.77352650807740  | -0.94085435826538 |
| H | 1.65825926095324  | 6.98182649142164  | -0.65874598898699 |

|   |                   |                   |                   |
|---|-------------------|-------------------|-------------------|
| C | -4.49404727720158 | -0.08944713411317 | 1.25312752970443  |
| H | -5.04552023825402 | 0.60862317536964  | 0.63096667080165  |
| C | -3.82516119894188 | -0.91076220516083 | 3.42189500788801  |
| H | -3.86489717330445 | -0.82040958189235 | 4.50357574241113  |
| C | -4.56408690646096 | -0.01032426322244 | 2.61584902695996  |
| H | -5.17867609745641 | 0.75251732732250  | 3.08482411747654  |
| C | -6.00535285493503 | -0.74679773574185 | -2.88339168612966 |
| H | -2.51127505669603 | -6.52233057895203 | 2.79291638961914  |
| C | 5.15150954683267  | -1.99790468783752 | 2.23030637119032  |
| H | 6.00973991720148  | -2.60277263001367 | 2.50892767533753  |
| C | 5.26918611034847  | -0.71953744821931 | 1.62367299702779  |
| H | 2.33504673278259  | 6.77976140718982  | -2.27763471848858 |
| C | 6.57507453858985  | -0.06787224307924 | 1.27881237115972  |
| H | 7.14802107454844  | -0.67895329415049 | 0.57166473335710  |
| H | 6.41126770952703  | 0.91334238920172  | 0.82547786036830  |
| H | 7.19462360294825  | 0.06552026194882  | 2.17270769835544  |
| H | -7.00538844253595 | -0.33283547134274 | -2.71235458731650 |
| H | -5.94761422993065 | -1.03778800669509 | -3.93876148159117 |
| H | -5.89961473710820 | -1.64933772135023 | -2.27558818844041 |

**3a**, CAMh-B3LYP/def2-SVP ground-state geometry

|   |                   |                   |                   |
|---|-------------------|-------------------|-------------------|
| S | -0.32334284000366 | 3.06733042874322  | -1.69232352037000 |
| S | -2.83523346656117 | 1.31509530342955  | -1.59713807201579 |
| S | 2.79692157055441  | -1.26191007184531 | 1.69135100346342  |
| S | 0.33186461010346  | -3.08448614207556 | 1.65589162325960  |
| C | -2.26886134897836 | -3.18220875904943 | -0.62256743515280 |
| C | -2.97373105368994 | -2.18832832582322 | -1.39141842138586 |
| C | 3.00393905805486  | 2.12881258549390  | -1.44539600700683 |
| C | 2.27914542407425  | 3.18610892409591  | 0.63618892930700  |
| C | 3.71721843337641  | 1.13006625580050  | -0.69064847853229 |
| C | 1.20346049043061  | 3.87327741754968  | -1.52378591433243 |
| C | -3.02396053432278 | -2.12024037462762 | 1.44590413536173  |
| C | 2.99506927540951  | 2.18916944240958  | 1.39099922822237  |
| C | 2.23183266029336  | 3.10226415451353  | -0.77325940777498 |
| C | 1.01326368475259  | -4.36556813628196 | 2.60891211897278  |
| C | -3.08540164298394 | -2.04483452845249 | 2.87629199864839  |
| H | -2.53612333621797 | -2.78544317896003 | 3.45835714545034  |
| C | -2.91710773558513 | -2.26906281213413 | -2.82174746171842 |



|   |                   |                   |                   |
|---|-------------------|-------------------|-------------------|
| H | -3.43501462775580 | -1.50702205791093 | -3.40470953647609 |
| C | -3.64211272042184 | -1.13213086944132 | -0.73252801531802 |
| C | -1.55607300768758 | -4.20897842298469 | -1.32489450480926 |
| H | -1.01906980427826 | -4.95774639456414 | -0.74182727296886 |
| C | -2.24022397450671 | -3.09340427497307 | 0.78704763872602  |
| C | -3.73438062162841 | -1.13011021109316 | 0.67715377679499  |
| C | -1.21739580881703 | -3.85790822911593 | 1.55139541180564  |
| C | 3.05026384143985  | 2.06336103788491  | -2.87688360901490 |
| H | 2.50405186423880  | 2.81502442738760  | -3.44769322092358 |
| C | -4.04634836788935 | 0.07711320357734  | -1.50031914496750 |
| C | 4.05334576824983  | -0.08476447995038 | 1.47808917451761  |
| C | 3.64639838635012  | 1.13003106571964  | 0.72043838388030  |
| C | 0.04915534858708  | -5.33726813038888 | 2.81310061392433  |
| H | 0.25357948204735  | -6.24361737428634 | 3.38720349653188  |
| C | 4.43193673484075  | 0.11577601950337  | -1.40882582132138 |
| H | 4.95930933651016  | -0.64868951155906 | -0.83769830654365 |
| C | -1.22217207751263 | -5.06182940135621 | 2.22002261502921  |
| C | -3.83069277144912 | 2.34559294180794  | -2.57789459213109 |
| C | -5.18331296729212 | 0.43433384202423  | -2.19079540741044 |
| C | 2.37315142757328  | -4.44461114969287 | 3.12290831576933  |
| H | 2.52031043652789  | -5.38466519740786 | 3.66463114536529  |
| C | -1.55126805504316 | -4.26368382367564 | -2.69022866496415 |
| H | -1.01139524572493 | -5.06239769848415 | -3.20377824507191 |
| C | 4.46517405497992  | 0.10194858278167  | -2.77488200941059 |
| H | 5.02526188378946  | -0.67473286527555 | -3.30042628786720 |
| C | -2.24061138136034 | -3.27631843410998 | -3.45054918221663 |
| H | -2.22059232414982 | -3.32346957365097 | -4.54163781437163 |
| C | 1.18274623173358  | 5.11479164711852  | -2.11935751163331 |
| C | -1.03145784502550 | 4.38780655905450  | -2.56906348503750 |
| C | 3.83658018516699  | -2.35596499824896 | 2.55000518467543  |
| C | -3.48268313472150 | 3.65819204596094  | -3.10369952476219 |
| H | -4.33348084947327 | 4.08865644087587  | -3.64211232806271 |
| C | -5.04804746228639 | 1.72367161861549  | -2.79263925919596 |
| H | -5.83974263948600 | 2.19000252977365  | -3.38289143049859 |
| C | 1.57559727596393  | 4.20879973637016  | 1.35357613417162  |
| H | 1.02425921355424  | 4.95610777285289  | 0.78224869812220  |
| C | 3.48025180905872  | -3.65741822519550 | 3.09768724590620  |
| H | 4.33797751933753  | -4.09719974604752 | 3.61719315618568  |

|   |                   |                   |                   |
|---|-------------------|-------------------|-------------------|
| C | 3.76463599747110  | 1.09257685763738  | -3.52078575586760 |
| H | 3.79507007240168  | 1.06909757508314  | -4.61240606471115 |
| C | 2.97057592448038  | 2.27096984893541  | 2.82219281195021  |
| H | 3.50520684696479  | 1.51153121470264  | 3.39357230243216  |
| C | 2.30580275187816  | 3.27711590862966  | 3.46500116773826  |
| H | 2.31070296582859  | 3.32596936970580  | 4.55618252199710  |
| C | -0.08989853621210 | 5.39250160395073  | -2.70847704702317 |
| H | -0.31200322691076 | 6.32497464242027  | -3.23189722915350 |
| C | -2.38625681637771 | 4.46052256715348  | -3.09742110349603 |
| H | -2.53809788191187 | 5.40858316811821  | -3.62362234004182 |
| C | 1.59655823749292  | 4.26134782946340  | 2.71890727184922  |
| H | 1.06295739421410  | 5.05695302146411  | 3.24373609673358  |
| C | -2.41109188578375 | -5.97597830290184 | 2.32107329481551  |
| H | -3.26866570733070 | -5.57727296349745 | 1.76176870766300  |
| H | -2.72380725817698 | -6.11077221348596 | 3.36916304344343  |
| C | 2.34777985587439  | 6.06398953031509  | -2.15115058435902 |
| H | 3.21387654647375  | 5.64879882010653  | -1.61754407778514 |
| H | 2.09073881103091  | 7.02799796935284  | -1.68370101966083 |
| C | -4.47222612871191 | -0.12195614838782 | 1.38060834682277  |
| H | -5.00348183148841 | 0.63155700726678  | 0.79841770867817  |
| C | -3.81719052399202 | -1.07756878379691 | 3.50583713429501  |
| H | -3.85850730750993 | -1.04646850022117 | 4.59692363372601  |
| C | -4.52284799207624 | -0.10123337535643 | 2.74599346412065  |
| H | -5.10056016815856 | 0.67000085055852  | 3.26032967544282  |
| C | -6.41541325187731 | -0.41868025634275 | -2.30639923990129 |
| H | -2.17999414173085 | -6.97638196596375 | 1.92168643417704  |
| C | 5.09699421129838  | -1.79357505475283 | 2.65094037821324  |
| H | 5.91951059220727  | -2.30434424515240 | 3.15617307244895  |
| C | 5.23541231297333  | -0.50610876889865 | 2.04567187460770  |
| H | 2.65911150504881  | 6.27955558693107  | -3.18599634391828 |
| C | 6.51712078211767  | 0.27902693005766  | 2.03086095884247  |
| H | 7.30981309080034  | -0.25981220613414 | 1.48707966395961  |
| H | 6.38071124197492  | 1.25588075132314  | 1.54709035090777  |
| H | 6.88887172461853  | 0.45555149546802  | 3.05278799656002  |
| H | -7.29933489094593 | 0.10056642818096  | -1.90262932381858 |
| H | -6.63568568636350 | -0.66261850101424 | -3.35814607824383 |
| H | -6.29900799173774 | -1.36364427560021 | -1.75841298426923 |

3a, CAMh-B3LYP/def2-SVP first excited-state geometry

|   |                   |                   |                   |
|---|-------------------|-------------------|-------------------|
| S | -0.30544534582149 | 3.01884155192584  | -2.09079136248664 |
| S | -3.03672679758983 | 1.56371416135443  | -1.42846653887823 |
| S | 2.80171290445157  | -1.22366286152068 | 2.08494172262318  |
| S | 0.52845771718341  | -3.32940878529731 | 1.47283186184715  |
| C | -2.07887074360043 | -3.11891493962201 | -0.49389225138763 |
| C | -2.70336892817040 | -2.18777779283509 | -1.39706689138673 |
| C | 2.79068006115168  | 2.14053835544169  | -1.44853663067318 |
| C | 2.15238103894548  | 2.99541040043805  | 0.77291410507051  |
| C | 3.52053499168059  | 1.05871712388382  | -0.83969053828366 |
| C | 0.98919302272445  | 3.86697296360575  | -1.27316149565242 |
| C | -2.95966351444769 | -1.87134746360780 | 1.44110801973246  |
| C | 2.95667852829048  | 1.96780233725996  | 1.38118041838937  |
| C | 2.02704603226727  | 3.04311574086923  | -0.64836007316638 |
| C | 1.01907412707035  | -4.17889588514254 | 2.91048600274363  |
| C | -3.07203338091482 | -1.60822836675702 | 2.83824219552334  |
| H | -2.46753630386422 | -2.18771628785960 | 3.53265662351109  |
| C | -2.47540352871185 | -2.36216572240061 | -2.79422049236962 |
| H | -2.84894718760266 | -1.60935104785786 | -3.48507170534061 |
| C | -3.44801363188127 | -1.08916231856974 | -0.87219532242228 |
| C | -1.39957592169503 | -4.24469627517055 | -1.04608358145538 |
| H | -0.98615625742840 | -4.98930771053493 | -0.36611603347432 |
| C | -2.12224489739010 | -2.90289531579450 | 0.91728562000009  |
| C | -3.65665904427200 | -0.99432984926921 | 0.53629507435651  |
| C | -1.17247815124998 | -3.60005478869266 | 1.78584200789496  |
| C | 2.82969106245886  | 2.26939807314438  | -2.86842805406953 |
| H | 2.33604569148464  | 3.12577944264651  | -3.32753400750746 |
| C | -3.82289017549032 | 0.03142629832651  | -1.73885228425761 |
| C | 4.00635999875903  | -0.29503582457310 | 1.21755703121992  |
| C | 3.55263756788885  | 0.94361624783063  | 0.58366175276796  |
| C | -0.11166407033459 | -4.69617326573157 | 3.54647663392682  |
| H | -0.03511029484001 | -5.30689067494765 | 4.44858857889380  |
| C | 4.11233302439417  | 0.08961086763888  | -1.70215097212660 |
| H | 4.57262581105507  | -0.79303123241181 | -1.26346133577609 |
| C | -1.34395074523147 | -4.36310845472243 | 2.94353085040459  |
| C | -3.68997209295084 | 2.29040887815623  | -2.86779558251771 |
| C | -4.60143115983281 | 0.10328251792158  | -2.89415768594559 |
| C | 2.37520113556787  | -4.39745045798667 | 3.33358145483247  |

|   |                   |                   |                   |
|---|-------------------|-------------------|-------------------|
| H | 2.46468722956231  | -5.23720805200454 | 4.03131350462315  |
| C | -1.26474243217732 | -4.41573532180426 | -2.40351409997792 |
| H | -0.74511528013394 | -5.29267823575857 | -2.79549504945933 |
| C | 4.10189003445633  | 0.23228733064643  | -3.07014835889859 |
| H | 4.57520673322966  | -0.52535857483329 | -3.69870066411986 |
| C | -1.78528481792241 | -3.44463042557738 | -3.28711004999778 |
| H | -1.63869496513154 | -3.55092728862997 | -4.36430953519079 |
| C | 0.73236510935147  | 5.23816847949243  | -1.23681837478282 |
| C | -1.22319443618896 | 4.47592853480718  | -2.33770494096161 |
| C | 3.88004165949530  | -2.56957915991914 | 2.31949663106934  |
| C | -3.46543405813396 | 3.64573575613561  | -3.29947454423510 |
| H | -4.24513047408264 | 4.00121620499995  | -3.98188323721298 |
| C | -4.53524714603577 | 1.37871484108903  | -3.49994749155191 |
| H | -5.09037634771511 | 1.63921754237463  | -4.40361157986313 |
| C | 1.44058617006229  | 3.87963999618622  | 1.63632980876383  |
| H | 0.74360050725259  | 4.59181766928990  | 1.19987815861106  |
| C | 3.56280001179510  | -3.78682132788165 | 3.01515170683099  |
| H | 4.45689948618833  | -4.31112423777915 | 3.36980793993392  |
| C | 3.47791195145500  | 1.35248588270372  | -3.66172750321009 |
| H | 3.49674418927556  | 1.48300116566147  | -4.74581787856968 |
| C | 3.12193575625153  | 1.98707227636118  | 2.79739203503366  |
| H | 3.78694071524283  | 1.25460319763789  | 3.25461635519410  |
| C | 2.47595527484508  | 2.90633925346042  | 3.59012713485854  |
| H | 2.62928029747526  | 2.90029417379494  | 4.67138076166243  |
| C | -0.49589527699606 | 5.56411324669560  | -1.85517037318636 |
| H | -0.86419184813068 | 6.58817675573588  | -1.94648318862590 |
| C | -2.49261612365480 | 4.56711828886362  | -3.01114108267221 |
| H | -2.69789846155603 | 5.57911134742633  | -3.37682817972993 |
| C | 1.60042817555249  | 3.84543423043674  | 3.00197636360657  |
| H | 1.04690184692067  | 4.54587121227635  | 3.63137006178670  |
| C | -2.67207545341929 | -4.84633056240751 | 3.45893288495216  |
| H | -3.48917072062336 | -4.58635891161947 | 2.77380437646410  |
| H | -2.90890982019153 | -4.41366845914129 | 4.44417912959979  |
| C | 1.67167713991766  | 6.26903217971000  | -0.67300928730850 |
| H | 2.61977311466458  | 5.81826980867085  | -0.35269723088578 |
| H | 1.23441949151413  | 6.78556378537286  | 0.19654865626961  |
| C | -4.53686513173506 | -0.01495617036019 | 1.08474963531394  |
| H | -5.11692503729068 | 0.60497283401379  | 0.40126263941593  |

|   |                   |                   |                   |
|---|-------------------|-------------------|-------------------|
| C | -3.90932908956902 | -0.63336939724542 | 3.32824297876984  |
| H | -3.97809753484634 | -0.46788855790486 | 4.40574435381353  |
| C | -4.67543706646473 | 0.15540677067597  | 2.44176532766393  |
| H | -5.36377108191757 | 0.90826487088254  | 2.83169582777457  |
| C | -5.46554251375844 | -1.01391199581303 | -3.41174223952283 |
| H | -2.66358364868546 | -5.94094426723285 | 3.58046723555322  |
| C | 5.13556610816691  | -2.24800244554112 | 1.79936369725837  |
| H | 5.98294708856239  | -2.93236560360682 | 1.87860377429489  |
| C | 5.21613461677177  | -0.99178461935266 | 1.16048774325626  |
| H | 1.89756373230598  | 7.03978029080176  | -1.42668130396286 |
| C | 6.48545161131810  | -0.45149645395488 | 0.56054085038207  |
| H | 6.81450595230687  | -1.05027122460102 | -0.30382694897710 |
| H | 6.36257999890781  | 0.58556920641110  | 0.22290037525170  |
| H | 7.30184461996316  | -0.47549398738999 | 1.29954487118891  |
| H | -6.50754446925524 | -0.67596349065157 | -3.52648603703215 |
| H | -5.12850625894608 | -1.36411254631443 | -4.40062416965659 |
| H | -5.45996167030273 | -1.87528145442746 | -2.73148258416549 |

**3b, r<sup>2</sup>SCAN-3c geometry**

|   |                   |                   |                   |
|---|-------------------|-------------------|-------------------|
| S | 0.23505862260602  | 2.87871259019280  | -2.86043166882495 |
| S | -2.44794868294180 | 1.52566009175261  | -1.97630596573543 |
| S | 3.40920062051449  | -1.84379406931993 | 1.19718158816848  |
| S | 0.53831564765803  | -2.91011778605980 | 1.84078088312475  |
| C | -2.00665101600162 | -3.02404083628570 | -0.70974238799844 |
| C | -2.66099853875803 | -2.05152458379473 | -1.54959914442797 |
| C | 3.39855513053213  | 2.43130820962663  | -1.08453753732959 |
| C | 1.40086259012199  | 2.27303747405886  | 0.31254356205450  |
| C | 4.05828054629343  | 1.45496477277174  | -0.24888237381112 |
| C | 1.28026908592009  | 3.67066360702873  | -1.70779706024466 |
| C | -2.60185209513533 | -1.71889501791067 | 1.26586593292227  |
| C | 2.05855911662181  | 1.30274316740371  | 1.14577657580475  |
| C | 2.07352306126937  | 2.80541873207668  | -0.81002131856373 |
| C | 1.18111587270496  | -4.41190087750508 | 2.46498611862364  |
| C | -2.63798653862434 | -1.53213534185283 | 2.67722604086914  |
| H | -2.14898627365579 | -2.26928014505218 | 3.30703564048023  |
| C | -2.63853080402201 | -2.25140373721172 | -2.95996378404503 |
| H | -3.09963025899615 | -1.50413054071892 | -3.59658274334082 |
| C | -3.22889979575374 | -0.89383821220250 | -0.97352558108079 |

|   |                   |                   |                   |
|---|-------------------|-------------------|-------------------|
| C | -1.36962773782066 | -4.13563136258575 | -1.33281922530458 |
| H | -0.84537672163621 | -4.85019683724973 | -0.70775788723118 |
| C | -1.93603821340121 | -2.81517902719573 | 0.68529377477167  |
| C | -3.25661191214821 | -0.74731176810455 | 0.42646671897938  |
| C | -1.00848609918668 | -3.63870623540323 | 1.48335924775902  |
| C | 4.11050591282017  | 2.96914901026800  | -2.19431064610264 |
| H | 3.60562223894084  | 3.69878338755069  | -2.82127839900560 |
| C | -3.61020637125637 | 0.22791226873832  | -1.85199657495984 |
| C | 3.91631958498912  | -0.23169508355393 | 1.63542803887626  |
| C | 3.37222886891508  | 0.88551575537926  | 0.83548944411175  |
| C | 0.19980147062580  | -5.38664377507701 | 2.40490710797911  |
| H | 0.37503746468727  | -6.39906975585375 | 2.75800686570570  |
| C | 5.39107819840582  | 1.07182714770053  | -0.57243153900724 |
| H | 5.87778305043677  | 0.33152496015819  | 0.05646902031671  |
| C | -1.03404734402946 | -4.96637355827118 | 1.84162969468297  |
| C | -3.32007449474834 | 2.27467994672152  | -3.29410220330559 |
| C | -4.62674038836801 | 0.37290613642123  | -2.76727887600211 |
| C | 2.49613375276867  | -4.63222409225767 | 3.02022239794514  |
| H | 2.58895653213249  | -5.63807516317543 | 3.42958149049176  |
| C | -1.40087309828673 | -4.30491218008279 | -2.68883282999167 |
| H | -0.91130352383654 | -5.16360981102203 | -3.13895804213653 |
| C | 6.04150078918783  | 1.62193033991717  | -1.64154008599241 |
| H | 7.05985568559100  | 1.32151052693410  | -1.87075340020243 |
| C | -2.04369134993498 | -3.35085634018309 | -3.51295359113354 |
| H | -2.04435977925805 | -3.48258100041592 | -4.59106606633975 |
| C | 0.94097448123509  | 4.99538950470828  | -1.56259219834004 |
| C | -0.73889273555112 | 4.31302128246574  | -3.06747671491499 |
| C | 3.83869039988688  | -2.48016610204219 | 2.76529393725941  |
| C | -2.97628275708105 | 3.49922371806317  | -3.97833793562899 |
| H | -3.75209979496849 | 3.78843669962498  | -4.68704898647798 |
| C | -4.45903650948799 | 1.53573290030671  | -3.56478378781185 |
| H | -5.16200153250027 | 1.82858242683171  | -4.33965868111794 |
| C | 0.05732541660075  | 2.63527317660173  | 0.62332942699795  |
| H | -0.44760359043870 | 3.36449636526872  | -0.00084261491236 |
| C | 3.59329716429348  | -3.85087272898670 | 3.17583056252040  |
| H | 4.40619625191887  | -4.29600411121050 | 3.74835650247153  |
| C | 5.39389381955168  | 2.58189612009999  | -2.46175889416086 |
| H | 5.92374115823575  | 3.00627467978937  | -3.30969376503137 |

|                                          |                   |                   |                   |
|------------------------------------------|-------------------|-------------------|-------------------|
| C                                        | 1.33677231039477  | 0.75077787870166  | 2.24442879626413  |
| H                                        | 1.82480420140187  | 0.01840199509965  | 2.87826206711579  |
| C                                        | 0.04606919366447  | 1.11982797756142  | 2.50163111910110  |
| H                                        | -0.49173614046191 | 0.67163116304721  | 3.33151290527325  |
| C                                        | -0.18233773978759 | 5.35575260096928  | -2.35787636312478 |
| H                                        | -0.61924100284019 | 6.35005401306875  | -2.35421486113255 |
| C                                        | -1.93663441543135 | 4.36464823657156  | -3.88708744789235 |
| H                                        | -2.03275877777639 | 5.27424433201731  | -4.47878928369263 |
| C                                        | -0.60156816371364 | 2.07314080749449  | 1.68087330519256  |
| H                                        | -1.63129655111200 | 2.34837546416873  | 1.88738070558659  |
| C                                        | -2.21346004954344 | -5.86910030880596 | 1.63477350596849  |
| H                                        | -3.05121669472475 | -5.32063425489576 | 1.19613211013924  |
| H                                        | -2.54656971235541 | -6.30121977797304 | 2.58501509107634  |
| C                                        | 1.61679600238470  | 5.92423348682639  | -0.60016507101793 |
| H                                        | 2.40856047173531  | 5.40718116879956  | -0.05158195782375 |
| H                                        | 0.90220627937660  | 6.32628156736383  | 0.12710129260632  |
| C                                        | -3.91173077756217 | 0.35492861323563  | 1.04630396323911  |
| H                                        | -4.40988397534141 | 1.08151217703434  | 0.41143236664505  |
| C                                        | -3.29164626593070 | -0.46705487808869 | 3.23240423639431  |
| H                                        | -3.32546829409814 | -0.35399181367849 | 4.31243736511253  |
| C                                        | -3.93660822720371 | 0.48773939275770  | 2.40698548439137  |
| H                                        | -4.45959933264354 | 1.32475680103027  | 2.86114030678840  |
| C                                        | -5.76007320361676 | -0.59699555249387 | -2.92024637287971 |
| H                                        | -1.96445512413763 | -6.70146723212036 | 0.96602229015549  |
| C                                        | 4.44647898220118  | -1.49420192895503 | 3.51333478726510  |
| H                                        | 4.80747568109276  | -1.67430018061820 | 4.52171381027483  |
| C                                        | 4.46770037940749  | -0.21302636100317 | 2.89510806986580  |
| H                                        | 2.06503937453724  | 6.77508214656234  | -1.12590846905157 |
| C                                        | 4.94165074023551  | 1.03593739766484  | 3.57435965377410  |
| H                                        | 6.00159889018605  | 0.95837208863785  | 3.84216902096385  |
| H                                        | 4.81771556807446  | 1.90423474328033  | 2.92188247698983  |
| H                                        | 4.38131384802452  | 1.21916721172141  | 4.49838881981221  |
| H                                        | -6.72275173915489 | -0.10664676822471 | -2.73675645392095 |
| H                                        | -5.79251667487837 | -1.01361533806585 | -3.93369155668963 |
| H                                        | -5.65816163804074 | -1.42545278656721 | -2.21445677517245 |
| <b>3c, r<sup>2</sup>SCAN-3c geometry</b> |                   |                   |                   |
| S                                        | -0.21616442741248 | 2.92127531166065  | -2.88115025262044 |

|   |                   |                   |                   |
|---|-------------------|-------------------|-------------------|
| S | -3.08315187335894 | 2.09543723649520  | -1.54956226469117 |
| S | 3.10140112690176  | -2.11011255212295 | 1.51224232438920  |
| S | 0.23421876904070  | -2.93581256599095 | 2.84359875448515  |
| C | -0.97260185963895 | -2.02004498690981 | -0.36855073140408 |
| C | -1.63890775317881 | -1.05391715200962 | -1.19990421559137 |
| C | 2.89623424030212  | 2.01270870329615  | -1.19402920978153 |
| C | 0.99070314354012  | 2.00539398532015  | 0.33106280092442  |
| C | 3.56262731298435  | 1.03604110244251  | -0.36231851774175 |
| C | 0.87488560020748  | 3.47985157073268  | -1.63628465234082 |
| C | -2.87823392183101 | -2.02761956376003 | 1.15641190526071  |
| C | 1.65700606185480  | 1.03930517207869  | 1.16246109578605  |
| C | 1.62714540008531  | 2.49232189701615  | -0.83309367190277 |
| C | 1.12342706495838  | -4.44013232757041 | 2.83194008388097  |
| C | -3.53902461508786 | -2.48108909390223 | 2.33379310285537  |
| H | -3.03705608995825 | -3.22168086585719 | 2.95010608006245  |
| C | -0.95835497225426 | -0.57130521065614 | -2.35579362324211 |
| H | -1.45884018010483 | 0.14441336803470  | -2.99667418997235 |
| C | -2.92432680817798 | -0.58672586230629 | -0.84540181341064 |
| C | 0.34076272989920  | -2.43504854996610 | -0.73432542103465 |
| H | 0.84879404166668  | -3.16294133846581 | -0.11400562225833 |
| C | -1.60909504700151 | -2.50713030410328 | 0.79551210696320  |
| C | -3.54462284271157 | -1.05089667480883 | 0.32475904007766  |
| C | -0.85675801421070 | -3.49456918886641 | 1.59874172914659  |
| C | 3.55698279971950  | 2.46605197892430  | -2.37148254128937 |
| H | 3.05500989672672  | 3.20660707799679  | -2.98783570635416 |
| C | -3.53278489525609 | 0.41959471826375  | -1.74248788264173 |
| C | 3.55086176797456  | -0.43421788836642 | 1.70508123543380  |
| C | 2.94237565075397  | 0.57200964283860  | 0.80791789217125  |
| C | 0.50998180142543  | -5.33723598251557 | 1.98798089907656  |
| H | 0.89168093159598  | -6.34214125207509 | 1.83280323530893  |
| C | 4.84670376253859  | 0.56599366581360  | -0.76071245554908 |
| H | 5.34144183883009  | -0.16713770405094 | -0.12965698840482 |
| C | -0.59246704269208 | -4.80305174179698 | 1.26445612158087  |
| C | -3.58630079014869 | 2.48745544252244  | -3.17550532085999 |
| C | -4.11703544466164 | 0.20319920311660  | -2.96970803781741 |
| C | 2.34254121918919  | -4.64588002527336 | 3.60263458768552  |
| H | 2.41754474722258  | -5.61098270126766 | 4.10249345452776  |
| C | 0.97237261256135  | -1.91774239882278 | -1.83062319148788 |



|   |                   |                   |                   |
|---|-------------------|-------------------|-------------------|
| H | 1.98442654406239  | -2.23161698528900 | -2.07070167643868 |
| C | 5.44079799928217  | 1.02295800338631  | -1.90395046508548 |
| H | 6.41998234854713  | 0.65179307416949  | -2.19264640669236 |
| C | 0.31260055154265  | -0.97613908105444 | -2.65441155593040 |
| H | 0.81851759663405  | -0.57314781661756 | -3.52736930696405 |
| C | 0.61088851829839  | 4.78840973893931  | -1.30206882856861 |
| C | -1.10532972684714 | 4.42561500423164  | -2.86921781641032 |
| C | 3.60434721718520  | -2.50191788294724 | 3.13829573881540  |
| C | -3.37141623189024 | 3.78775630169139  | -3.78843350111973 |
| H | -4.15933044675476 | 4.10362249792855  | -4.47142414886151 |
| C | -4.16952488019814 | 1.38487871201442  | -3.76012940300022 |
| H | -4.56145415210247 | 1.40503456197557  | -4.77292007335332 |
| C | -0.32258131884474 | 2.42057523159479  | 0.69693318984334  |
| H | -0.83059995334026 | 3.14846366628930  | 0.07659639597206  |
| C | 3.38938348753841  | -3.80213334470568 | 3.75137446003101  |
| H | 4.17723544473509  | -4.11792458387296 | 4.43446976073534  |
| C | 4.78889330932531  | 1.98514305436638  | -2.71810269921688 |
| H | 5.27669202886339  | 2.34180096348265  | -3.62075106684038 |
| C | 0.97653515344039  | 0.55690841192789  | 2.31848809977511  |
| H | 1.47702966665059  | -0.15876097845145 | 2.95941262907255  |
| C | -0.29435397729116 | 0.96188850760783  | 2.61718660187248  |
| H | -0.80021458957336 | 0.55905126523233  | 3.49024840146519  |
| C | -0.49160741173885 | 5.32270308105704  | -2.02543658088389 |
| H | -0.87314833955963 | 6.32766466222010  | -1.87024946796079 |
| C | -2.32454031697283 | 4.63146622045848  | -3.63972987784301 |
| H | -2.39956767408180 | 5.59660712839659  | -4.13950966147268 |
| C | -0.95412637565177 | 1.90345509157313  | 1.79335706851744  |
| H | -1.96612121008644 | 2.21746106904500  | 2.03351206336071  |
| C | -1.30624639062610 | -5.54087460326437 | 0.17240964071705  |
| H | -2.18403778986699 | -4.98463245894809 | -0.16552980849018 |
| H | -1.63302761069763 | -6.52822590909015 | 0.51592432042717  |
| C | 1.32494605610765  | 5.52616578327111  | -0.21015709179234 |
| H | 2.20292330096724  | 4.96998718829544  | 0.12741490144940  |
| H | 0.66789198096117  | 5.67687167705618  | 0.65521975044728  |
| C | -4.82873932416087 | -0.58093471772617 | 0.72313215372178  |
| H | -5.32347386640564 | 0.15223571760021  | 0.09211922881963  |
| C | -4.77097076119700 | -2.00025927085681 | 2.68039482675706  |
| H | -5.25880062818638 | -2.35701769667623 | 3.58298581307632  |

|   |                   |                   |                   |
|---|-------------------|-------------------|-------------------|
| C | -5.42287335906563 | -1.03802711343867 | 1.86629775784122  |
| H | -6.40208656168027 | -0.66692740626399 | 2.15497874445329  |
| C | -4.54619608180790 | -1.14643107876959 | -3.45971187526615 |
| H | -0.64892037748651 | -5.69180181402396 | -0.69271984476605 |
| C | 4.18761551637204  | -1.39929800408225 | 3.72280117936529  |
| H | 4.57951893716213  | -1.41934785339981 | 4.73560575801997  |
| C | 4.13514865675238  | -0.21770247689440 | 2.93225410385412  |
| H | 1.65147051379547  | 6.51361428661719  | -0.55363158511569 |
| C | 4.56430553739800  | 1.13198298472269  | 3.42211195943295  |
| H | 5.62524436847187  | 1.12997401541142  | 3.69658079680986  |
| H | 4.41177467875170  | 1.89268102867190  | 2.65226667778001  |
| H | 3.99441664026575  | 1.42700141419099  | 4.31097250177258  |
| H | -3.97630669703460 | -1.44135887131880 | -4.34860154736025 |
| H | -4.39367793481753 | -1.90720998894071 | -2.68994948419060 |
| H | -5.60713300743707 | -1.14438455188096 | -3.73418488980211 |

**3d**, r<sup>2</sup>SCAN-3c geometry

|   |                   |                   |                   |
|---|-------------------|-------------------|-------------------|
| S | 0.00489588756891  | 4.14416343952888  | -2.18729211413686 |
| S | -2.61636739006840 | 1.85293412658055  | -1.82590438619593 |
| S | 2.82872876877131  | -0.98698381671290 | 2.97946107746103  |
| S | 0.92307054247260  | -3.01014729384223 | 1.48053730690668  |
| C | -1.47438530881590 | -2.78172416453184 | -1.01717889591578 |
| C | -2.14138690154447 | -1.82639498882736 | -1.86831659576813 |
| C | 1.64118483544295  | 1.50079135817457  | -0.67362967543379 |
| C | 2.21273932540133  | 3.22429789145239  | 0.96544312796194  |
| C | 2.57550813512598  | 0.60427533271209  | -0.03980422052281 |
| C | 0.26738297616889  | 3.59956237298006  | -0.54131557268148 |
| C | -2.42341467220741 | -1.70000922347134 | 0.95359699003624  |
| C | 3.10295828210515  | 2.30281658772449  | 1.62941349132596  |
| C | 1.42574554277147  | 2.79107242102684  | -0.12397006011137 |
| C | 1.15638939931777  | -4.11067863124421 | 2.81937167597244  |
| C | -2.56218783622300 | -1.55602730657166 | 2.36485133732338  |
| H | -1.98900204080524 | -2.21097784514980 | 3.01216364293800  |
| C | -1.94075090181338 | -1.91855331655320 | -3.27501936952788 |
| H | -2.40794720757414 | -1.17489171255046 | -3.91292454510400 |
| C | -2.92841874041519 | -0.80643807395144 | -1.29588416140562 |
| C | -0.68431688251768 | -3.79832803112054 | -1.62597934417448 |
| H | -0.19744303560847 | -4.52525591249823 | -0.98284349458389 |

|   |                   |                   |                   |
|---|-------------------|-------------------|-------------------|
| C | -1.58392696531429 | -2.68102141745272 | 0.38310293990566  |
| C | -3.12790592198244 | -0.77608560458650 | 0.10151296866167  |
| C | -0.74104552779560 | -3.49852962950966 | 1.27733466990383  |
| C | 0.90982025606284  | 1.00515380711986  | -1.79162873654874 |
| H | 0.17472189866274  | 1.63809372201247  | -2.26663634857652 |
| C | -3.40669853691416 | 0.32518644065968  | -2.11129637224458 |
| C | 3.88765978986958  | -0.08451845208922 | 1.92254730503433  |
| C | 3.23738036907567  | 0.99356118929704  | 1.14741808283528  |
| C | -0.00730051336065 | -4.82894155877584 | 3.02852030066501  |
| H | -0.08277982950051 | -5.58800610829413 | 3.80214255535860  |
| C | 2.74011913064587  | -0.70547029759215 | -0.57777818527240 |
| H | 3.43170895413330  | -1.38414087684286 | -0.09182271668448 |
| C | -1.09048446299965 | -4.47685588632608 | 2.18077263620256  |
| C | -3.59187633042494 | 2.66107104817385  | -3.02804416186592 |
| C | -4.37702231553784 | 0.43340328436882  | -3.08279887703428 |
| C | 2.37926352136139  | -4.30933171274140 | 3.56742666058399  |
| H | 2.33860839051235  | -5.21216552629666 | 4.17670337111930  |
| C | -0.54512624378000 | -3.86958246719613 | -2.98437601800310 |
| H | 0.05349562805210  | -4.65982540324664 | -3.42845169810377 |
| C | 2.04000122335464  | -1.12194953052652 | -1.67414206130105 |
| H | 2.17809393676925  | -2.12740303717946 | -2.06109094308182 |
| C | -1.17449144774693 | -2.91268224956493 | -3.81854735381250 |
| H | -1.04162222662103 | -2.96759743466875 | -4.89536855335125 |
| C | -0.82684546311982 | 3.89615797534446  | 0.24733010964939  |
| C | -1.62617686074280 | 4.66431090857307  | -1.82487422592749 |
| C | 3.89734006672253  | -2.36552848389911 | 2.98658687662295  |
| C | -3.44713819758201 | 4.05421357531405  | -3.38550514420700 |
| H | -4.12939646221635 | 4.37795125045453  | -4.17133888300632 |
| C | -4.47252842404493 | 1.75813726423476  | -3.59240673392354 |
| H | -5.18090002557420 | 2.04546187230000  | -4.36441926674173 |
| C | 2.12889555800302  | 4.55436892418082  | 1.46864025388570  |
| H | 1.48693161639140  | 5.26027537126790  | 0.95055144448506  |
| C | 3.54434355444356  | -3.61993897411546 | 3.63096107392323  |
| H | 4.33911739618890  | -4.07836366806336 | 4.21806051445523  |
| C | 1.10796304857551  | -0.25480179911716 | -2.28408255896808 |
| H | 0.53121877228810  | -0.59662478095906 | -3.13783896239674 |
| C | 3.80801880763819  | 2.74129150751355  | 2.78669007008163  |
| H | 4.45877588128738  | 2.02980970742952  | 3.28748328522359  |

|   |                   |                   |                   |
|---|-------------------|-------------------|-------------------|
| C | 3.68691604953374  | 4.02401352763848  | 3.24148072445198  |
| H | 4.24297442305857  | 4.34651095172172  | 4.11705045527403  |
| C | -1.87987417016731 | 4.50564723847997  | -0.48905653456369 |
| H | -2.85216843529914 | 4.72580206986321  | -0.05932654859590 |
| C | -2.58167580228379 | 4.96924914985123  | -2.89716005472929 |
| H | -2.59315543513609 | 5.97005947857249  | -3.32492733974039 |
| C | 2.84683550535389  | 4.94486321164854  | 2.56485649618994  |
| H | 2.77872599599457  | 5.96938252566840  | 2.91941322694841  |
| C | -2.46380384783909 | -5.06913624066380 | 2.28742471127415  |
| H | -3.11420563903099 | -4.69211512632586 | 1.49399065989037  |
| H | -2.92706322369536 | -4.82170897790958 | 3.25000712407375  |
| C | -0.97239484072855 | 3.51353422749761  | 1.68933820130184  |
| H | -0.31529267873261 | 2.67932480487835  | 1.94732009590809  |
| H | -2.00509455661880 | 3.21692275622473  | 1.89924802080048  |
| C | -4.00443033113473 | 0.17168077620658  | 0.70610923645038  |
| H | -4.57380475312486 | 0.83356287603276  | 0.06237287452985  |
| C | -3.39328167404436 | -0.61397638965548 | 2.90379710552919  |
| H | -3.48296468001714 | -0.52519792080836 | 3.98264497872962  |
| C | -4.14242754287685 | 0.24510654745246  | 2.06386150062523  |
| H | -4.82515930403874 | 0.96768618721818  | 2.50174330082628  |
| C | -5.24600063344755 | -0.70194958397619 | -3.53496507481055 |
| H | -2.42565049987926 | -6.16139887773117 | 2.21202939645052  |
| C | 5.05728123948233  | -2.05752383542943 | 2.30956876134941  |
| H | 5.87066973771156  | -2.76876448970239 | 2.19974486740354  |
| C | 5.04886766603935  | -0.77950633033089 | 1.67967373176014  |
| H | -0.71736465071399 | 4.34859326380796  | 2.35388460455525  |
| C | 6.12555746745219  | -0.29485531285183 | 0.75655386917841  |
| H | 6.27766769754539  | -0.99386554365177 | -0.07411544981116 |
| H | 5.86620080264487  | 0.68128218460806  | 0.33798907491200  |
| H | 7.08121403967898  | -0.19825833974035 | 1.28435719623311  |
| H | -5.04653011923492 | -0.96208814330544 | -4.58150390834896 |
| H | -5.07077967371918 | -1.59348134741534 | -2.92710536627007 |
| H | -6.30636995506533 | -0.43710948022782 | -3.46066446968548 |

**3e, r<sup>2</sup>SCAN-3c geometry**

|   |                   |                   |                   |
|---|-------------------|-------------------|-------------------|
| S | -0.05619128165961 | 3.07307723432175  | -1.46956662528006 |
| S | -2.70992694007374 | 1.40299325587994  | -1.56207699638687 |
| S | 2.74536132418029  | -0.60073654288206 | 2.51831626875663  |

|   |                   |                   |                   |
|---|-------------------|-------------------|-------------------|
| S | -0.54249664611389 | -3.15303511840801 | 1.95999730605410  |
| C | -2.62984835615434 | -3.11888509447416 | -0.88618409841933 |
| C | -3.19487967796263 | -1.96822133856421 | -1.54566002545440 |
| C | 3.03506876137363  | 1.79830821441610  | -1.37595854139742 |
| C | 2.98379042784057  | 3.22957309036486  | 0.59786867487025  |
| C | 3.71511513783959  | 0.76947433599600  | -0.62978792095150 |
| C | 1.53975498255139  | 3.78308146762912  | -1.37299154095190 |
| C | -3.61154337288090 | -2.36991811709606 | 1.22011453283276  |
| C | 3.72535211360692  | 2.23153506010538  | 1.32731761020594  |
| C | 2.57992345979268  | 2.96481322891639  | -0.72597549256629 |
| C | 0.44299757449001  | -4.56391569827225 | 2.28390572276537  |
| C | -3.88500203481748 | -2.55809314972277 | 2.60471631655764  |
| H | -3.49700358245349 | -3.44972871878897 | 3.08821150524544  |
| C | -3.00854875412806 | -1.82682336931083 | -2.95058422793727 |
| H | -3.45540499424603 | -0.96986759921953 | -3.44486001813752 |
| C | -3.85734912522615 | -0.97522260736754 | -0.79514183926095 |
| C | -1.84421107629312 | -4.01734477349861 | -1.66223408147039 |
| H | -1.36278242394278 | -4.85068478814945 | -1.16332117556924 |
| C | -2.78498946583919 | -3.26670602226030 | 0.51132826591103  |
| C | -4.13912231624048 | -1.19823604112109 | 0.56712356083791  |
| C | -1.81744656666270 | -4.10236552713191 | 1.25067915039522  |
| C | 2.76648234885387  | 1.57872940816726  | -2.75752071917814 |
| H | 2.28559531612533  | 2.37274894361313  | -3.31992338575316 |
| C | -4.09611567147400 | 0.34995503041209  | -1.39587843034948 |
| C | 4.18184527593796  | -0.20506597169695 | 1.61027127188706  |
| C | 3.99031656409704  | 0.97357083448268  | 0.74414298673886  |
| C | -0.22812555339322 | -5.69575321180558 | 1.86935285907555  |
| H | 0.19761042842297  | -6.69188202917788 | 1.94772100869887  |
| C | 3.98331106275010  | -0.46227163363000 | -1.29185926248869 |
| H | 4.41693690144775  | -1.27669280927608 | -0.72493965780867 |
| C | -1.50831271452738 | -5.44498713257259 | 1.28750361880386  |
| C | -3.68004086065472 | 2.69670265909083  | -2.22987763348206 |
| C | -5.24613873661407 | 0.96727382806756  | -1.83075990602506 |
| C | 1.83066234164846  | -4.29229708412479 | 2.60652126467579  |
| H | 2.57952562809156  | -4.93558930553391 | 2.14725960964504  |
| C | -1.69131378571174 | -3.84580177900846 | -3.01044108418489 |
| H | -1.09680070938293 | -4.55322313539479 | -3.58138781992993 |
| C | 3.70165067220135  | -0.63631742249471 | -2.61886717317487 |

|   |                   |                   |                   |
|---|-------------------|-------------------|-------------------|
| H | 3.92781930750135  | -1.58434814778337 | -3.09828525205058 |
| C | -2.29471813089037 | -2.74624324911080 | -3.66683509259117 |
| H | -2.17593450218379 | -2.62643952446473 | -4.73971175930720 |
| C | 1.55390753625061  | 5.05020792578367  | -1.91005384395809 |
| C | -0.72032576424149 | 4.48857801044523  | -2.25043590199587 |
| C | 3.28324495088346  | -2.24437093671055 | 2.79745316981564  |
| C | -3.24282509395018 | 3.99747404280520  | -2.66086734753139 |
| H | -4.08240234802309 | 4.55295417526480  | -3.07834885641958 |
| C | -5.00062378362950 | 2.28030843143863  | -2.30374773909769 |
| H | -5.78181753992301 | 2.92463028755084  | -2.69672989465528 |
| C | 2.61443956430030  | 4.42649031522967  | 1.27455743698296  |
| H | 2.01412936553020  | 5.15628167330224  | 0.74103494540028  |
| C | 2.16593156899362  | -3.09189809664412 | 3.14203547382204  |
| H | 1.34681371585073  | -2.54325840690177 | 3.61102674458920  |
| C | 3.10811501344528  | 0.40570907726707  | -3.36939966187170 |
| H | 2.90590262895939  | 0.26399904375050  | -4.42693863347811 |
| C | 4.10603887941575  | 2.51458597305679  | 2.66955935222160  |
| H | 4.68355150198136  | 1.76872370301377  | 3.20768784548749  |
| C | 3.77340912016583  | 3.69933507235628  | 3.26618672274460  |
| H | 4.09044431278798  | 3.90294704157532  | 4.28477733205560  |
| C | 0.28218719356507  | 5.43450979492717  | -2.40367353591665 |
| H | 0.09404156123829  | 6.39620188763002  | -2.87229061191870 |
| C | -2.07767091768425 | 4.70194929215387  | -2.67364220729769 |
| H | -2.18263595904201 | 5.69607555620300  | -3.10766671373442 |
| C | 3.00492911131096  | 4.65996770554599  | 2.56418876982228  |
| H | 2.72199122359215  | 5.58585762357624  | 3.05662580106121  |
| C | -2.40255987122851 | -6.52197854228968 | 0.74934981165544  |
| H | -3.27316822197711 | -6.09058504559810 | 0.24777148535920  |
| H | -2.76248315396709 | -7.16932157525777 | 1.55740191273556  |
| C | 2.77816219776592  | 5.91368304186977  | -1.97711753201431 |
| H | 3.65751013687451  | 5.37190644285554  | -1.61867314690818 |
| H | 2.66081408053656  | 6.81414739721805  | -1.36262431748935 |
| C | -4.87044479286673 | -0.25900848268274 | 1.34879953288143  |
| H | -5.23292904551641 | 0.64303267606511  | 0.86608524158945  |
| C | -4.62973719810850 | -1.65302054322342 | 3.30845409314615  |
| H | -4.84253173766851 | -1.82419813364454 | 4.35961723760377  |
| C | -5.11771201222118 | -0.48347474777947 | 2.67467129209911  |
| H | -5.68794358203568 | 0.24058094371416  | 3.24948553629059  |

|   |                   |                   |                   |
|---|-------------------|-------------------|-------------------|
| C | -6.59786797539800 | 0.31823229425821  | -1.81147513798754 |
| H | -1.87274332602578 | -7.15985473083708 | 0.03230900169888  |
| C | 4.55466411882767  | -2.41139422707180 | 2.29455591965030  |
| H | 5.09707567700112  | -3.34990282975077 | 2.35480380080627  |
| C | 5.07030716925810  | -1.26149546972426 | 1.62415663136699  |
| H | 2.97020142602678  | 6.24152682260797  | -3.00459287624919 |
| C | 6.42427618004560  | -1.21713068913001 | 0.98006835829111  |
| H | 6.58481518535401  | -2.07721481237111 | 0.32001595815373  |
| H | 6.54785490231802  | -0.30292325350632 | 0.39345672606912  |
| H | 7.21201322460924  | -1.23977870349877 | 1.74223006002732  |
| H | -7.29247788362821 | 0.87292203924778  | -1.16996599286602 |
| H | -7.03287143490275 | 0.28860189928422  | -2.81664036313369 |
| H | -6.53246425407651 | -0.70617861249543 | -1.43526065275416 |
